# Supplementary material
Source: Elsevier journal article supplement (https://www.sciencedirect.com/science/article/pii/S0300893224002033)
Supplement: mmc1 [file mmc1.pdf]

---

**SUPPLEMENTARY DATA**

**Supplementary data 1. Systematic review search strategy**

PubMed

1245 results

((Coronary Diseases[MeSH]) OR (Artery Disease, Coronary[MeSH]) OR (coronary artery disease[Title/Abstract]) OR (Atherosclerosis, Coronary[MeSH]) OR (coronary atherosclerosis[Title/Abstract]) OR (CAD[Title/Abstract]) OR (Angina Pectoris[MeSH]) OR (angina[Title/Abstract]) OR (Angina, Unstable[MeSH]) OR (unstable angina[Title/Abstract]) OR (Infarction, Myocardial[MeSH]) OR (Myocardial infarction[Title/Abstract]) OR (MI[Title/Abstract]) OR (chronic coronary syndrome[Title/Abstract]) OR (CCS[Title/Abstract]) OR (Coronary Syndrome, Acute[MeSH]) OR (acute coronary syndrome[Title/Abstract]) OR (Non-ST Elevation Myocardial Infarction[MeSH]) OR (Non-ST-Elevation Myocardial Infarction[Title/Abstract]) OR (Non-ST-segment elevation acute coronary syndrome[Title/Abstract]) OR (NSTEMI[Title/Abstract]) OR (NSTEMI-ACS[Title/Abstract]) OR (ST-segment elevation myocardial infarction[MeSH]) OR (ST Elevation Myocardial Infarction[Title/Abstract]) OR (STEMI[Title/Abstract])) AND ((coronary microvascular dysfunction[Title/Abstract]) OR (coronary microcirculation[Title/Abstract]) OR (coronary microcirculatory[Title/Abstract]) OR (Coronary flow reserve[Title/Abstract]) OR (coronary flow velocity reserve[Title/Abstract]) OR (coronary flow reserve velocity[Title/Abstract]) OR (CFR[Title/Abstract]) OR (CFVR[Title/Abstract]) OR (index of microvascular resistance[Title/Abstract]) OR (IMR[Title/Abstract]) OR (hyperemic microvascular resistance[Title/Abstract]) OR (HMR[Title/Abstract]) OR (resistive reserve ratio[Title/Abstract]) OR (RRR[Title/Abstract]) OR (coronary angiography-derived index[Title/Abstract]) OR (invasively-determined index[Title/Abstract]) OR (caIMR[Title/Abstract]) OR (IMRangio[Title/Abstract])) AND ((cardiovascular events[Title/Abstract]) OR (major adverse cardiovascular event[Title/Abstract]) OR (major adverse cardiovascular events[Title/Abstract]) OR (MACE[Title/Abstract]) OR (MACEs[Title/Abstract]) OR (mortality[Title/Abstract]) OR (survival[Title/Abstract]) OR (death[Title/Abstract]) OR (outcome[Title/Abstract]) OR (outcomes[Title/Abstract]) OR (prognosis[Title/Abstract]) OR (prognostic[Title/Abstract]))))

EMBASE

1753 results

('coronary artery disease'/exp OR 'coronary artery disease':ab,ti OR 'coronary artery atherosclerosis':ab,ti OR cad:ab,ti OR 'angina pectoris':ab,ti OR 'myocardial infarction':ab,ti OR mi:ab,ti OR 'chronic coronary syndrome':ab,ti OR 'acute coronary syndrome':ab,ti OR 'non ST segment elevation myocardial infarction':ab,ti OR 'non ST segment elevation acute coronary syndrome':ab,ti OR 'ST segment elevation myocardial infarction':ab,ti) AND ('coronary microvascular dysfunction'/exp OR 'coronary microvascular dysfunction':ab,ti OR 'coronary microcirculation':ab,ti OR 'coronary flow reserve':ab,ti OR 'coronary flow velocity reserve':ab,ti OR 'coronary flow reserve velocity':ab,ti OR 'cfr':ab,ti OR 'cfvr':ab,ti OR 'index of microvascular resistance':ab,ti OR 'imr':ab,ti OR 'hyperemic microvascular resistance':ab,ti OR 'hmr':ab,ti OR 'resistive reserve ratio':ab,ti OR 'rrr':ab,ti OR 'coronary

angiography-derived index':ab,ti OR 'invasively-determined index':ab,ti OR 'caimr':ab,ti OR 'imrango':ab,ti) AND ('cardiovascular events':ab,ti OR 'major adverse cardiovascular event':ab,ti OR 'mace':ab,ti OR 'mortality':ab,ti OR 'survival':ab,ti OR 'death':ab,ti OR 'outcome':ab,ti OR 'prognosis':ab,ti)

### Cochrane

753 results

((MeSH descriptor: [Coronary Artery Disease] this term only) OR (coronary atherosclerosis):ti,ab,kw OR (angina pectoris):ti,ab,kw OR (myocardial infarction):ti,ab,kw OR (chronic coronary syndrome):ti,ab,kw OR (acute coronary syndrome):ti,ab,kw OR (Non-ST Elevation Myocardial Infarction):ti,ab,kw OR (Non–ST-segment elevation acute coronary syndrome):ti,ab,kw OR (ST segment elevation myocardial infarction):ti,ab,kw OR (STEMI):ti,ab,kw OR (NSTEMI):ti,ab,kw) AND ((coronary microvascular dysfunction):ti,ab,kw OR (coronary microcirculation):ti,ab,kw OR (coronary flow reserve):ti,ab,kw OR (coronary flow velocity reserve):ti,ab,kw OR (CFR):ti,ab,kw OR (CFVR):ti,ab,kw OR (index of microvascular resistance):ti,ab,kw OR (IMR):ti,ab,kw OR (hyperemic microvascular resistance):ti,ab,kw OR (HMR):ti,ab,kw OR (resistive reserve ratio):ti,ab,kw OR (RRR):ti,ab,kw OR (coronary angiography-derived index):ti,ab,kw OR (caIMR):ti,ab,kw OR (IMRango):ti,ab,kw) AND ((cardiovascular events):ti,ab,kw OR (major adverse cardiovascular event):ti,ab,kw OR (MACE):ti,ab,kw OR (mortality):ti,ab,kw OR (survival):ti,ab,kw OR (death):ti,ab,kw OR (outcome):ti,ab,kw OR (prognosis):ti,ab,kw)

**Table 1 of the supplementary data.** Newcastle-Ottawa scale score of included observational studies

| Source                                  | Representativeness of the exposed cohort | Selection of the nonexposed cohort | Ascertainment of exposure | Demonstration that outcome of interest was not present at start of study | Comparability of cohorts on the basis of the design or analysis | Assessment of outcome | Was follow-up long enough for outcomes to occur? | Adequacy of follow-up of cohorts | Total score |
|-----------------------------------------|------------------------------------------|------------------------------------|---------------------------|--------------------------------------------------------------------------|-----------------------------------------------------------------|-----------------------|--------------------------------------------------|----------------------------------|-------------|
| Takahashi et al. <sup>1</sup> 2007      | 1                                        | 1                                  | 1                         | 0                                                                        | 0                                                               | 1                     | 1                                                | 1                                | 6           |
| Meuwissen et al. <sup>2</sup> 2008      | 1                                        | 1                                  | 1                         | 1                                                                        | 1                                                               | 1                     | 0                                                | 0                                | 7           |
| Fearon et al. <sup>3</sup> 2013         | 1                                        | 1                                  | 1                         | 0                                                                        | 1                                                               | 1                     | 1                                                | 1                                | 7           |
| van de Hoef et al. <sup>4</sup> 2013    | 1                                        | 1                                  | 1                         | 0                                                                        | 1                                                               | 1                     | 1                                                | 1                                | 7           |
| Ahn et al. <sup>5</sup> 2017            | 1                                        | 1                                  | 1                         | 1                                                                        | 1                                                               | 1                     | 1                                                | 0                                | 7           |
| de Waard et al. <sup>6</sup> 2018       | 1                                        | 1                                  | 1                         | 0                                                                        | 1                                                               | 1                     | 1                                                | 0                                | 7           |
| Lee et al. <sup>7</sup> 2018            | 1                                        | 1                                  | 1                         | 1                                                                        | 1                                                               | 1                     | 1                                                | 1                                | 8           |
| Murai et al. <sup>8</sup> 2018          | 1                                        | 1                                  | 1                         | 0                                                                        | 1                                                               | 1                     | 1                                                | 0                                | 6           |
| Hu et al. <sup>9</sup> 2019             | 1                                        | 1                                  | 1                         | 1                                                                        | 1                                                               | 1                     | 1                                                | 0                                | 7           |
| Nishi et al. <sup>10</sup> 2019         | 1                                        | 1                                  | 1                         | 1                                                                        | 1                                                               | 1                     | 1                                                | 0                                | 7           |
| Suda et al. <sup>11</sup> 2019          | 1                                        | 1                                  | 1                         | 0                                                                        | 1                                                               | 1                     | 1                                                | 0                                | 6           |
| Joo Myung Lee et al. <sup>12</sup> 2020 | 1                                        | 1                                  | 1                         | 1                                                                        | 1                                                               | 1                     | 1                                                | 0                                | 7           |
| Lee et al. <sup>13</sup> 2020           | 1                                        | 1                                  | 1                         | 1                                                                        | 1                                                               | 1                     | 1                                                | 0                                | 7           |
| Maznyczka et al. <sup>14</sup> 2020     | 1                                        | 1                                  | 1                         | 0                                                                        | 1                                                               | 1                     | 0                                                | 1                                | 6           |
| Abdu et al. <sup>15</sup> 2021          | 1                                        | 1                                  | 1                         | 0                                                                        | 1                                                               | 1                     | 1                                                | 1                                | 7           |
| Choi et al. <sup>16</sup> 2021          | 1                                        | 1                                  | 1                         | 0                                                                        | 1                                                               | 1                     | 1                                                | 0                                | 6           |
| Johnson et al. <sup>17</sup> 2021       | 1                                        | 1                                  | 1                         | 1                                                                        | 0                                                               | 1                     | 1                                                | 0                                | 6           |

|                                          |   |   |   |   |   |   |   |   |   |
|------------------------------------------|---|---|---|---|---|---|---|---|---|
| Kotronias et al. <sup>18</sup> 2021      | 1 | 1 | 1 | 0 | 1 | 1 | 1 | 1 | 7 |
| Scarsini et al. <sup>19</sup> 2021       | 1 | 1 | 1 | 0 | 1 | 1 | 1 | 1 | 7 |
| Toya et al. <sup>20</sup> 2021           | 1 | 1 | 1 | 1 | 1 | 1 | 1 | 1 | 8 |
| Dai et al. <sup>21</sup> 2022            | 1 | 1 | 1 | 1 | 1 | 1 | 1 | 0 | 7 |
| Feng et al. <sup>22</sup> 2022           | 1 | 1 | 1 | 1 | 1 | 1 | 1 | 0 | 7 |
| Liu et al. <sup>23</sup> 2022            | 1 | 1 | 1 | 1 | 1 | 1 | 1 | 0 | 7 |
| FISIOIAM <sup>24</sup> 2022              | 1 | 1 | 1 | 0 | 1 | 1 | 1 | 1 | 7 |
| Kim et al. <sup>25</sup> 2022            | 1 | 1 | 1 | 1 | 1 | 1 | 1 | 0 | 7 |
| Lee et al. <sup>26</sup> 2022            | 1 | 1 | 1 | 1 | 1 | 1 | 1 | 0 | 7 |
| Mejia-Renteria et al. <sup>27</sup> 2022 | 1 | 1 | 1 | 1 | 0 | 1 | 1 | 0 | 6 |

**Table 2 of the supplementary data.** Definitions of MACE in included studies

| Study                                   | Definitions of MACE                                                                                                                                                          |
|-----------------------------------------|------------------------------------------------------------------------------------------------------------------------------------------------------------------------------|
| Takahashi et al. <sup>1</sup> 2007      | Cardiac death, recurrent acute myocardial infarction, congestive heart failure requiring hospitalization                                                                     |
| Meuwissen et al. <sup>2</sup> 2008      | Cardiac death, myocardial infarction, coronary angioplasty bypass grafting, percutaneous coronary intervention of the target artery                                          |
| Fearon et al. <sup>3</sup> 2013         | Death, re-hospitalization due to congestive heart failure                                                                                                                    |
| van de Hoef et al. <sup>4</sup> 2013    | Cardiac mortality                                                                                                                                                            |
| Ahn et al. <sup>5</sup> 2017            | Cardiac death, myocardial infarction, subsequent revascularization                                                                                                           |
| de Waard et al. <sup>6</sup> 2018       | Death, hospitalization for heart failure                                                                                                                                     |
| Lee et al. <sup>7</sup> 2018            | Vessel-related cardiac death, vessel-specific myocardial infarction, vessel-specific revascularization                                                                       |
| Murai et al. <sup>8</sup> 2018          | Death, myocardial infarction, clinically driven target or nontarget vessel revascularization, congestive heart failure requiring hospitalization                             |
| Hu et al. <sup>9</sup> 2019             | Cardiac death, vessel-related myocardial infarction, vessel-related ischemia-driven revascularization                                                                        |
| Nishi et al. <sup>10</sup> 2019         | All-cause mortality, any myocardial infarction, target vessel revascularization                                                                                              |
| Suda et al. <sup>11</sup> 2019          | Cardiac death, nonfatal myocardial infarction, unstable angina                                                                                                               |
| Joo Myung Lee et al. <sup>12</sup> 2020 | All-cause mortality, any myocardial infarction, revascularization                                                                                                            |
| Lee et al. <sup>13</sup> 2020           | All-cause mortality, any myocardial infarction, revascularization                                                                                                            |
| Maznyczka et al. <sup>14</sup> 2020     | Heart failure hospitalization, all-cause death, nonfatal myocardial infarction                                                                                               |
| Abdu et al. <sup>15</sup> 2021          | Cardiovascular death, nonfatal myocardial infarction, heart failure, stroke, angina rehospitalization                                                                        |
| Choi et al. <sup>16</sup> 2021          | Cardiac death, readmission for heart failure                                                                                                                                 |
| Johnson et al. <sup>17</sup> 2021       | All-cause death, myocardial infarction, revascularization                                                                                                                    |
| Kotronias et al. <sup>18</sup> 2021     | All-cause mortality, resuscitated cardiac arrest, new heart failure                                                                                                          |
| Scarsini et al. <sup>19</sup> 2021      | All-cause mortality, heart failure, resuscitated cardiac arrest, malignant ventricular arrhythmias, the need for a primary prevention implantable cardioverter-defibrillator |
| Toya et al. <sup>20</sup> 2021          | All-cause mortality                                                                                                                                                          |
| Dai et al. <sup>21</sup> 2022           | Cardiac death, heart failure re-hospitalization                                                                                                                              |

|                                          |                                                                                                                                            |
|------------------------------------------|--------------------------------------------------------------------------------------------------------------------------------------------|
| Feng et al. <sup>22</sup> 2022           | Cardiovascular death, nonfatal myocardial infarction, heart failure, ischemia-driven revascularization                                     |
| Liu et al. <sup>23</sup> 2022            | Cardiovascular death, nonfatal myocardial infarction, coronary revascularization, angina-related re-hospitalization, heart failure, stroke |
| FISIOIAM <sup>24</sup> 2022              | Cardiovascular death, myocardial infarction, coronary revascularization, hospitalization due to heart failure, unstable angina             |
| Kim et al. <sup>25</sup> 2022            | Cardiac death, myocardial infarction, target vessel revascularization                                                                      |
| Lee et al. <sup>26</sup> 2022            | All-cause death, target vessel myocardial infarction, clinically driven target vessel revascularization                                    |
| Mejia-Renteria et al. <sup>27</sup> 2022 | Cardiac death, target vessel myocardial infarction, target vessel revascularization                                                        |

MACE, major adverse cardiovascular event.

**Table 3 of the supplementary data.** Characteristics of included studies

| Source                               | Study design               | Center        | Study population | Guide wire/ software                                 | Index    | Abnormal cutoff   | Follow-up duration (months) |
|--------------------------------------|----------------------------|---------------|------------------|------------------------------------------------------|----------|-------------------|-----------------------------|
| Takahashi et al. <sup>1</sup> 2007   | Observational, prospective | Single-center | 118              | Intracoronary Doppler guide wire                     | CFR      | ≤ 1.3             | 62                          |
| Meuwissen et al. <sup>2</sup> 2008   | Observational, prospective | Single-center | 170              | Intracoronary pressure guide wire                    | CFR      | < 2               | 12                          |
| Fearon et al. <sup>3</sup> 2013      | Observational, prospective | Multicenter   | 253              | Intracoronary pressure guide wire                    | IMR      | > 40              | 33.6                        |
| van de Hoef et al. <sup>4</sup> 2013 | Observational, prospective | Single-center | 94               | Intracoronary Doppler flow wire                      | CVFR     | < 2.1             | 120                         |
| Ahn et al. <sup>5</sup> 2017         | Observational, prospective | Multicenter   | 1837             | Intracoronary pressure guide wire                    | pb-CFR   | < 2               | 36                          |
| de Waard et al. <sup>6</sup> 2018    | Observational, prospective | Multicenter   | 176              | Intracoronary Doppler-pressure guide wire            | HMR      | HMR≥3             | 38.4                        |
| Lee et al. <sup>7</sup> 2018         | Observational, prospective | Multicenter   | 519              | Intracoronary pressure-temperature sensor guide wire | CFR      | < 2               | 60                          |
| Murai et al. <sup>8</sup> 2018       | Observational, prospective | Single-center | 83               | Intracoronary pressure guide wire                    | IMR      | ≥22.9             | 20.7                        |
| Hu et al. <sup>9</sup> 2019          | Observational, prospective | Multicenter   | 283              | Intracoronary pressure-temperature sensor guide wire | IMR      | ≥25               | 24                          |
| Nishi et al. <sup>10</sup> 2019      | Observational, prospective | Multicenter   | 572              | Intracoronary pressure-temperature sensor guide wire | CFR, IMR | CFR ≤ 2<br>IMR≥25 | 48                          |
| Suda et al. <sup>11</sup> 2019       | Observational, prospective | Single-center | 187              | Intracoronary pressure-temperature sensor guide wire | IMR      | ≥18               | 29                          |

|                                         |                              |               |      |                                                              |                       |                                            |       |
|-----------------------------------------|------------------------------|---------------|------|--------------------------------------------------------------|-----------------------|--------------------------------------------|-------|
| Joo Myung Lee et al. <sup>12</sup> 2020 | Observational, prospective   | Multicenter   | 867  | Intracoronary pressure-temperature sensor guide wire         | CFR, IMR              | CFR ≤ 2<br>IMR ≥ 23                        | 60    |
| Lee et al. <sup>13</sup> 2020           | Observational, prospective   | Multicenter   | 1245 | Intracoronary pressure-temperature sensor guide wire         | RRR                   | < 3.5                                      | 60    |
| Maznyczka et al. <sup>14</sup> 2020     | Observational, prospective   | Multicenter   | 144  | Intracoronary pressure-temperature sensor guide wire         | CFR, IMR, RRR         | CFR ≤ 2<br>IMR > 40<br>RRR ≤ 1.7           | 12    |
| Abdu et al. <sup>15</sup> 2021          | Observational, retrospective | Single-center | 109  | FlashAngio system                                            | caIMR                 | > 43U                                      | 24    |
| Choi et al. <sup>16</sup> 2021          | Observational, retrospective | Single-center | 309  | FlashAngio system                                            | Angio-IMR             | > 40U                                      | 120   |
| Johnson et al. <sup>17</sup> 2021       | Observational, prospective   | Multicenter   | 430  | Intracoronary Doppler-pressure guide wire                    | CFR                   | < 2                                        | 24    |
| Kotronias et al. <sup>18</sup> 2021     | Observational, retrospective | Single-center | 262  | Intracoronary pressure guide wire / QAngio R® XA 3D software | CFR, IMR, NH IMRangio | CFR ≤ 2.0<br>IMR > 40<br>NH IMRangio > 43U | 50.4  |
| Scarsini et al. <sup>19</sup> 2021      | Observational, prospective   | Single-center | 198  | Intracoronary pressure-temperature sensor guide wire         | IMR                   | > 40                                       | 40.1  |
| Toya et al. <sup>20</sup> 2021          | Observational, retrospective | Single-center | 1692 | Intracoronary Doppler guide wire                             | CFR, RRR              | CFR < 2.5<br>RRR < 2.62                    | 135.6 |
| Dai et al. <sup>21</sup> 2022           | Observational, prospective   | Single-center | 138  | QAngio XA software                                           | Angio-IMR             | ≥ 25.1                                     | 28    |
| Feng et al. <sup>22</sup> 2022          | Observational,               | Single-center | 282  | Flash Angio system                                           | caIMR                 | ≥ 25                                       | 35    |



|                                          |                            |               |     |                                                      |          |                     |    |
|------------------------------------------|----------------------------|---------------|-----|------------------------------------------------------|----------|---------------------|----|
|                                          | retrospective              |               |     |                                                      |          |                     |    |
| Liu et al. <sup>23</sup> 2022            | Observational, prospective | Single-center | 151 | Flash Angio system                                   | caIMR    | ≥25                 | 35 |
| FISIOIAM <sup>24</sup> 2022              | Observational, prospective | Single-center | 84  | NA                                                   | CFR, IMR | CFR < 2<br>IMR > 25 | 48 |
| Kim et al. <sup>25</sup> 2022            | Observational, prospective | Multicenter   | 400 | Intracoronary pressure-temperature sensor guide wire | CFR      | ≤ 2                 | 60 |
| Lee et al. <sup>26</sup> 2022            | Observational, prospective | Multicenter   | 287 | Intracoronary Doppler-pressure guide wire            | CFR      | ≤ 2.5               | 60 |
| Mejia-Renteria et al. <sup>27</sup> 2022 | Observational, prospective | Multicenter   | 514 | Intracoronary pressure-temperature sensor guide wire | CFR      | ≤ 2                 | 60 |

CFR, coronary flow reserve; caIMR, coronary angiography-derived index of microcirculatory resistance; HMR, hyperemic microvascular resistance; IMR, microcirculation resistance index; NA, not applicable; NH IMRangio, nonhyperemic angiography-derived index of microcirculatory resistance; pb-CFR, pressure-bounded coronary flow reserve; RRR, resistive reserve ratio.

**Table 4 of the supplementary data.** Main inclusion criteria

| Source                                  | Main inclusion criteria                                                                                                              | Diagnosis |
|-----------------------------------------|--------------------------------------------------------------------------------------------------------------------------------------|-----------|
| Takahashi et al. <sup>1</sup> 2007      | Patients with a first anterior-wall acute myocardial infarction treated with primary coronary angioplasty < 12 h after symptom onset | ACS       |
| Meuwissen et al. <sup>2</sup> 2008      | Patients with intermediate coronary lesions (diameter stenosis 40%-70%) who deferred PCI                                             | CCS       |
| Fearon et al. <sup>3</sup> 2013         | Patients presenting with STEMI after primary PCI                                                                                     | ACS       |
| van de Hoef et al. <sup>4</sup> 2013    | Patients presenting with STEMI after primary PCI                                                                                     | ACS       |
| Ahn et al. <sup>5</sup> 2017            | Patients with CAD who underwent FFR measurement                                                                                      | CCS*      |
| de Waard et al. <sup>6</sup> 2018       | Patients with both STEMI and NSTEMI after revascularization                                                                          | ACS       |
| Lee et al. <sup>7</sup> 2018            | Patients with stable angina before coronary intervention                                                                             | CCS       |
| Murai et al. <sup>8</sup> 2018          | Patients with STEMI after primary PCI                                                                                                | ACS       |
| Hu et al. <sup>9</sup> 2019             | Patients with 30% stenosis in a major epicardial coronary artery by visual estimation                                                | CCS       |
| Nishi et al. <sup>10</sup> 2019         | Stable CAD, all patients underwent elective and successful PCI                                                                       | CCS       |
| Suda et al. <sup>11</sup> 2019          | Angina-like chest pain, nonobstructive CAD                                                                                           | CCS       |
| Joo Myung Lee et al. <sup>12</sup> 2020 | Patients with stable angina, unstable angina, NSTEMI, or STEMI                                                                       | CCS*      |
| Lee et al. <sup>13</sup> 2020           | Patients with stable angina, unstable angina, NSTEMI, or STEMI                                                                       | CCS*      |
| Maznyczka et al. <sup>14</sup> 2020     | Patients with STEMI                                                                                                                  | ACS       |
| Abdu et al. <sup>15</sup> 2021          | Patients with myocardial infarction with no obstructive coronary atherosclerosis                                                     | ACS       |
| Choi et al. <sup>16</sup> 2021          | Patients with STEMI                                                                                                                  | ACS       |
| Johnson et al. <sup>17</sup> 2021       | Patients with intermediate coronary stenosis (diameter stenosis ≥50%) who underwent immediate PCI                                    | CCS*      |
| Kotronias et al. <sup>18</sup> 2021     | Patients with STEMI                                                                                                                  | ACS       |
| Scarsini et al. <sup>19</sup> 2021      | Patients with STEMI                                                                                                                  | ACS       |
| Toya et al. <sup>20</sup> 2021          | Patients with cardiac ischemia or angina without obstructive CAD                                                                     | CCS       |

|                                          |                                                                                         |      |
|------------------------------------------|-----------------------------------------------------------------------------------------|------|
| Dai et al. <sup>21</sup> 2022            | Stable CAD patients who received PCI                                                    | CCS  |
| Feng et al. <sup>22</sup> 2022           | Patients with CCS                                                                       | CCS  |
| Liu et al. <sup>23</sup> 2022            | INOCA (all native coronary stenosis < 50% in all epicardial vessels and major branches) | CCS  |
| FISIOIAM <sup>24</sup> 2022              | Patients with STEMI (nonculprit lesion)                                                 | ACS  |
| Kim et al. <sup>25</sup> 2022            | CAD Patients with FFR 0.75-0.8                                                          | CCS  |
| Lee et al. <sup>26</sup> 2022            | Patients with INOCA (typical angina symptoms and functional nonobstructive CAD)         | CCS  |
| Mejia-Renteria et al. <sup>27</sup> 2022 | Patients with stable angina, unstable angina, NSTEMI, or STEMI                          | CCS* |

\* These studies recruited all CAD population, but stable angina accounted for > 80% of the study population. Thus, they were categorized as CCS population.

ACS, acute coronary syndrome; CAD, coronary artery disease; CCS, chronic coronary syndrome; FFR, fractional flow reserve; INOCA, ischemia with no obstructive coronary atherosclerosis; NSTEMI, non–ST-segment elevation myocardial infarction; PCI, percutaneous coronary intervention; STEMI, ST segment elevation myocardial infarction.

**Table 5 of the supplementary data.** Baseline characteristics of included patients

| Source                                     | Age                                           | Men<br>No. % | BMI<br>kg/m <sup>2</sup> | Hypertension<br>No. % | Diabetes<br>mellitus<br>No. % | Smoking<br>history<br>No. % | Dyslipidemia<br>No. % |
|--------------------------------------------|-----------------------------------------------|--------------|--------------------------|-----------------------|-------------------------------|-----------------------------|-----------------------|
| Takahashi et al. <sup>1</sup> 2007         | 60 ± 9 (CFR ≤ 1.3)<br>62 ± 11 (CFR > 1.3)     | 81           | NA                       | 46                    | 33                            | 70                          | 47                    |
| Meuwissen et al. <sup>2</sup> 2008         | 61 (31 -84)                                   | 74           | NA                       | 36                    | 17                            | 30                          | 61                    |
| Fearon et al. <sup>3</sup> 2013            | 56.8 ± 10.6                                   | 85.4         | 25.0 ± 3.7               | 45.1                  | 24.1                          | 46.6                        | 66.8                  |
| van de Hoef et al. <sup>4</sup> 2013       | 56 ± 12                                       | 79           | NA                       | 22                    | 6                             | 51                          | 25                    |
| Ahn et al. <sup>5</sup> 2017               | 64.9 ± 10.1 (CFR < 2)<br>62.0 ± 9.6 (CFR ≥ 2) | 72           | NA                       | 65.8                  | 31.6                          | 24                          | 62                    |
| de Waard et al. <sup>6</sup> 2018          | 60 ± 10                                       | 80           | 26.5 ± 3.8               | 41                    | 23                            | 51                          | 42                    |
| Lee et al. <sup>7</sup> 2018               | 61.5 ± 10.2                                   | 70.9         | 24.5 ± 2.9               | 58.8                  | 28.9                          | 18.1                        | 63.6                  |
| Murai et al. <sup>8</sup> 2018             | 63.7 ± 9.7                                    | 84           | NA                       | 68.7                  | 33.7                          | 37.3                        | 44.6                  |
| Hu et al. <sup>9</sup> 2019                | 61.95 ± 10.02                                 | 76           | NA                       | 60.8                  | 34.6                          | 26.2                        | 54.1                  |
| Nishi et al. <sup>10</sup> 2019            | 67 ± 9                                        | 82           | 25.6 ± 4.6               | 71                    | 38                            | 26                          | 68                    |
| Suda et al. <sup>11</sup> 2019             | 63.2 ± 12.3                                   | 60           | NA                       | 53                    | 28                            | 28                          | 35                    |
| Joo Myung Lee et al. <sup>12</sup><br>2020 | 63.8 ± 10.3                                   | 74           | 25.0 ± 3.7               | 63                    | 33.7                          | 21.3                        | 62.6                  |

|                                     |                                                                  |      |                                                                                                        |      |      |      |      |
|-------------------------------------|------------------------------------------------------------------|------|--------------------------------------------------------------------------------------------------------|------|------|------|------|
| Lee et al. <sup>13</sup> 2020       | 64.7 ± 10.3                                                      | 76.9 | 24.9 ± 3.7 (RRR ≥ 5)<br>24.9 ± 3.4 (RRR 3.5-4.9)<br>24.7 ± 3.5 (RRR 2.5-3.4)<br>24.8 ± 3.6 (RRR < 2.5) | 65.6 | 35.7 | 21.4 | 63   |
| Maznyczka et al. <sup>14</sup> 2020 | 59 ± 111                                                         | 80   | 28.1 (24.6-31.0)                                                                                       | 28.5 | 11.1 | 47.2 | NA   |
| Abdu et al. <sup>15</sup> 2021      | 64.47 ± 13.15<br>(calMR > 43U)<br>63.13 ± 12.98<br>(calMR ≤ 43U) | 51.4 | 23.55 ± 3.77<br>(calMR > 43U)<br>23.78 ± 4.20<br>(calMR ≤ 43U)                                         | 50.5 | 17.4 | 46.8 | 18.3 |
| Choi et al. <sup>16</sup> 2021      | 61.4 ± 11.2                                                      | 74.8 | 24.1 ± 3.1                                                                                             | 47.2 | 50.2 | 26.9 | 34.3 |
| Johnson et al. <sup>17</sup> 2021   | 67 ± 10                                                          | 74   | NA                                                                                                     | 68   | 27   | 56   | 88   |
| Kotronias et al. <sup>18</sup> 2021 | 62 ± 11                                                          | 82   | NA                                                                                                     | 46   | 16   | 42   | 84   |
| Scarsini et al. <sup>19</sup> 2021  | 60.2 ± 10.7                                                      | 85.9 | NA                                                                                                     | 44.9 | 19.8 | 36.7 | 38.5 |
| Toya et al. <sup>20</sup> 2021      | 51.4 ± 12.5                                                      | 34   | 28.1 (24.5-32.7)                                                                                       | 43   | 11   | 47   | 55   |
| Dai et al. <sup>21</sup> 2022       | 65.0 ± 8.7                                                       | 69.6 | 24.6 ± 3.0                                                                                             | 72.5 | 36.2 | 26.1 | 8.0  |
| Feng et al. <sup>22</sup> 2022      | 64.95 ± 9.46                                                     | 69.1 | 22.49 (21.33-23.28)<br>(normal weight)<br>26.45 (25.08-27.98)<br>(overweight)                          | 70.6 | 34   | 24.1 | 20.9 |
| Liu et al. <sup>23</sup> 2022       | 60.6 ± 9.5                                                       | 41.1 | 25.00 ± 3.38                                                                                           | 50.3 | 14.6 | 15.2 | 10.6 |

|                                                    |                                                                                                                            |      |                                                                                                                             |      |      |      |      |
|----------------------------------------------------|----------------------------------------------------------------------------------------------------------------------------|------|-----------------------------------------------------------------------------------------------------------------------------|------|------|------|------|
| FISIOIAM <sup>24</sup> 2022                        | 62 ± 10                                                                                                                    | 87   | 28.77 ± 4.5 (CFR ≥ 2)<br>27.01 ± 3.54 (CFR < 2)                                                                             | 50.6 | 13.3 | 67.5 | 38.6 |
| Kim <i>et al.</i> <sup>25</sup> 2022               | 63.9 ± 10.2                                                                                                                | 79.1 | 26.3 ± 3.8                                                                                                                  | 66.2 | 32.7 | 21.8 | 71.2 |
| Lee <i>et al.</i> <sup>26</sup> 2022               | 63.0 ± 10.6 (CFR ≤ 2.5)<br>59.7 ± 9.4 (CFR > 2.5)<br>62.7 ± 9.5 (INOCA,<br>CFR ≤ 2.5)<br>63.0 ± 10.5 (INOCA,<br>CFR > 2.5) | 64.1 | 25.9 ± 4.9 (CFR ≤ 2.5)<br>26.6 ± 3.8<br>(CFR > 2.5)<br>26.6 ± 4.2<br>(INOCA, CFR ≤ 2.5)<br>26.6 ± 4.2<br>(INOCA, CFR > 2.5) | 48.8 | 16.7 | 25.8 | 56.1 |
| Mejia-Renteria <i>et al.</i> <sup>27</sup><br>2022 | 63 (57-70)                                                                                                                 | 76   | 24.6 (22.8-26.3)                                                                                                            | 64   | 33   | 20   | 68   |

Values are expressed as mean ± standard deviation or median (P<sub>25</sub>, P<sub>75</sub>) or No. (%).

BMI, body mass index; CFR, coronary flow reserve; caIMR, coronary angiography-derived index of microcirculatory resistance; INOCA, ischemia with

no obstructive coronary atherosclerosis; NA, not applicable; RRR, resistive reserve ratio.

**Figure 1 of the supplementary data.** Flow diagram. Preferred reporting items for systematic reviews and meta-analyses 2020 demonstrating search results and study selection.

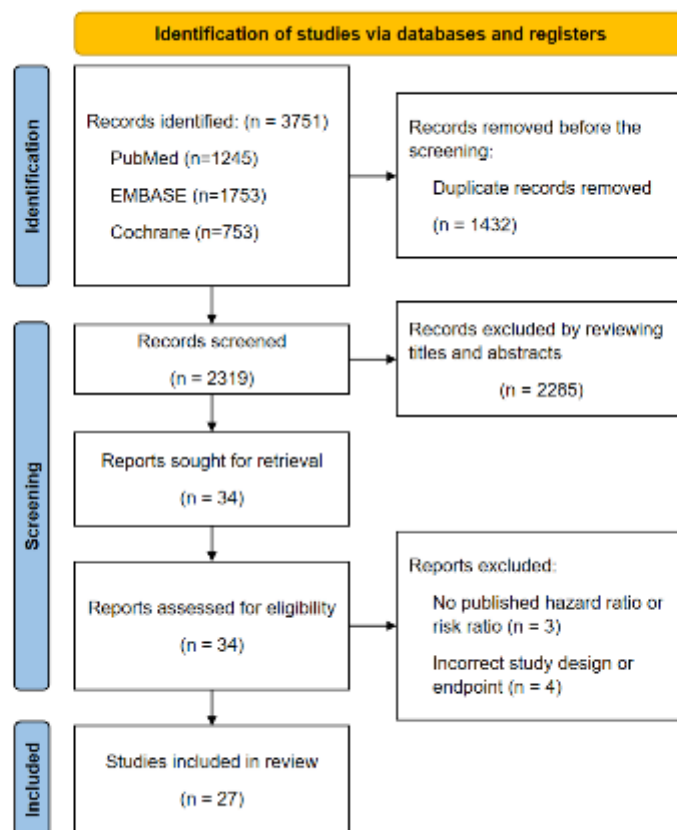

**Figure 2 of the supplementary data.** Subgroup analysis for all-cause death stratified by measurement modalities.

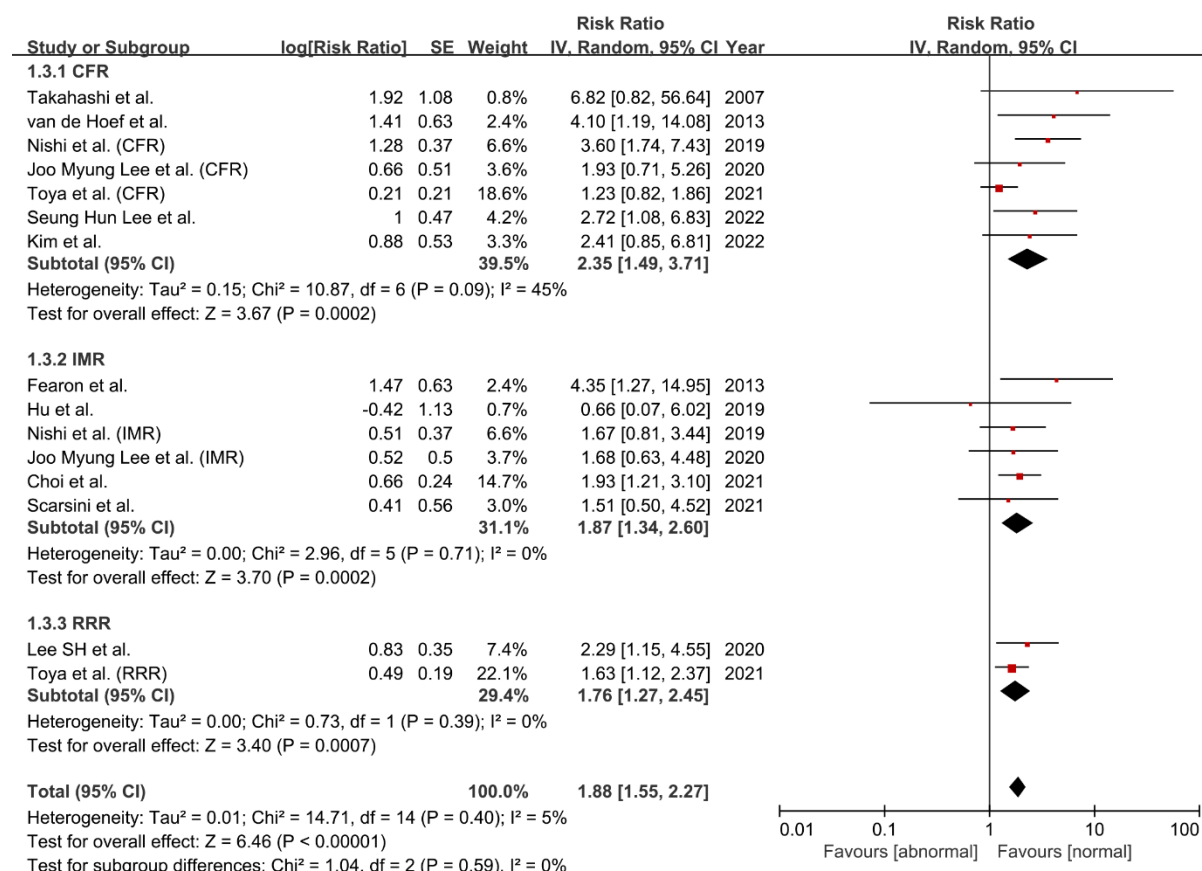

Risk ratios for individual studies are indicated by squares, and 95% CIs are indicated by horizontal lines.

Pooled estimates and their 95% CIs are represented by diamonds. The sizes of the squares and the diamonds are proportional to the weight assigned to the relative effect sizes.

CFR, coronary flow reserve; 95%CI, 95% confidence intervals; IMR, index of microvascular resistance; IV, inverse-variance; RRR, resistive reserve ratio; SE, standard error.

References: Takahashi et al.<sup>1</sup> van de Hoef et al.<sup>4</sup> Fearon et al.<sup>3</sup> Nishi et al.<sup>10</sup> Hu et al.<sup>9</sup> Joo Myung Lee et al.<sup>12</sup> Lee SH et al.<sup>13</sup> Scarsini et al.<sup>19</sup> Toya et al.<sup>20</sup> Choi et al.<sup>16</sup> Kim et al.<sup>25</sup> Seung Hun Lee et al.<sup>26</sup>



**Figure 3 of the supplementary data.** Subgroup analysis for MACE stratified by the measurement method of IMR

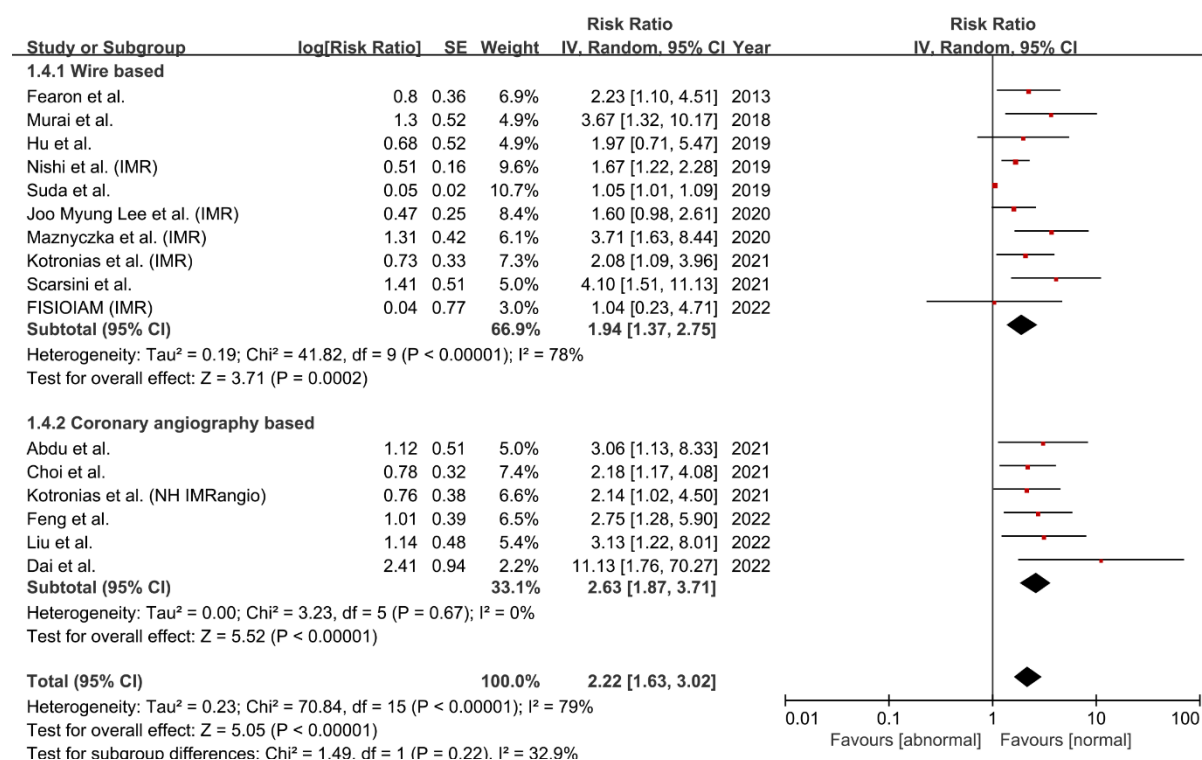

Risk ratios for individual studies are indicated by squares, and 95% CIs are indicated by horizontal lines.

Pooled estimates and their 95% CIs are represented by diamonds. The sizes of the squares and the diamonds are proportional to the weight assigned to the relative effect sizes.

95%CI, 95% confidence intervals; IMR, index of microvascular resistance; IV, inverse-variance; MACE, major adverse cardiovascular event; NH IMRangio, nonhyperemic angiography-derived index of microcirculatory resistance; SE, standard error.

References: Fearon et al.<sup>3</sup> Murai et al.<sup>8</sup> Hu et al.<sup>9</sup> Nishi et al.<sup>10</sup> Suda et al.<sup>11</sup> Joo Myung Lee et al.<sup>12</sup> Maznyczka et al.<sup>14</sup> Kotronias et al.<sup>18</sup> Scarsini et al.<sup>19</sup> FISIOIAM.<sup>24</sup> Abdu et al.<sup>15</sup> Choi et al.<sup>16</sup> Feng et al.<sup>22</sup> Liu et al.<sup>23</sup> Dai et al.<sup>21</sup>

**Figure 4 of the supplementary data.** Subgroup analysis for all-cause death stratified by CAD populations

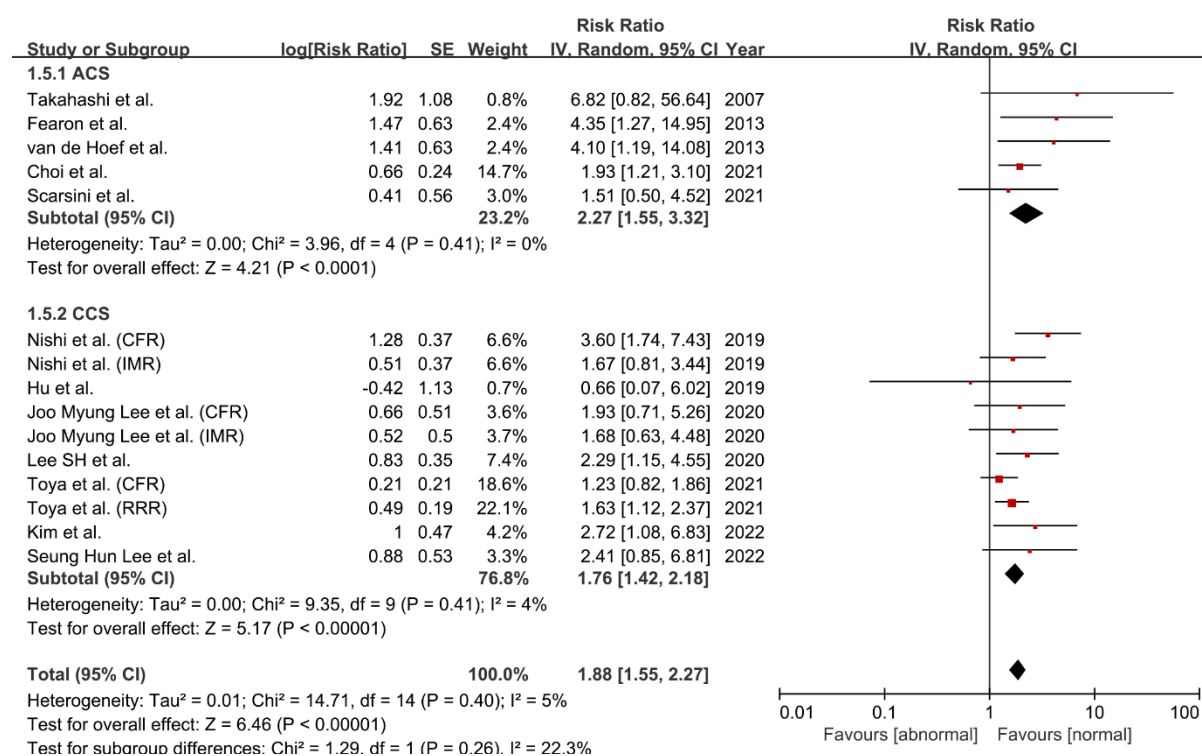

Risk ratios for individual studies are indicated by squares, and 95% CIs are indicated by horizontal lines.

Pooled estimates and their 95% CIs are represented by diamonds. The sizes of the squares and the diamonds are proportional to the weight assigned to the relative effect sizes.

CAD, coronary artery disease; CFR, coronary flow reserve; 95%CI, 95% confidence interval; IV, inverse-variance; IMR, index of microvascular resistance; RRR, resistive reserve ratio; SE, standard error.

References: Takahashi et al.<sup>1</sup> Fearon et al.<sup>3</sup> van de Hoef et al.<sup>4</sup> Choi et al.<sup>16</sup> Scarsini et al.<sup>19</sup> Nishi et al.<sup>10</sup>

Hu et al.<sup>9</sup> Joo Myung Lee et al.<sup>12</sup> Lee SH et al.<sup>13</sup> Toya et al.<sup>20</sup> Kim et al.<sup>25</sup> Seung Hun Lee et al.<sup>26</sup>

Figure 5 of the supplementary data. Subgroup analysis for MACE stratified by measurement modalities in ACS population

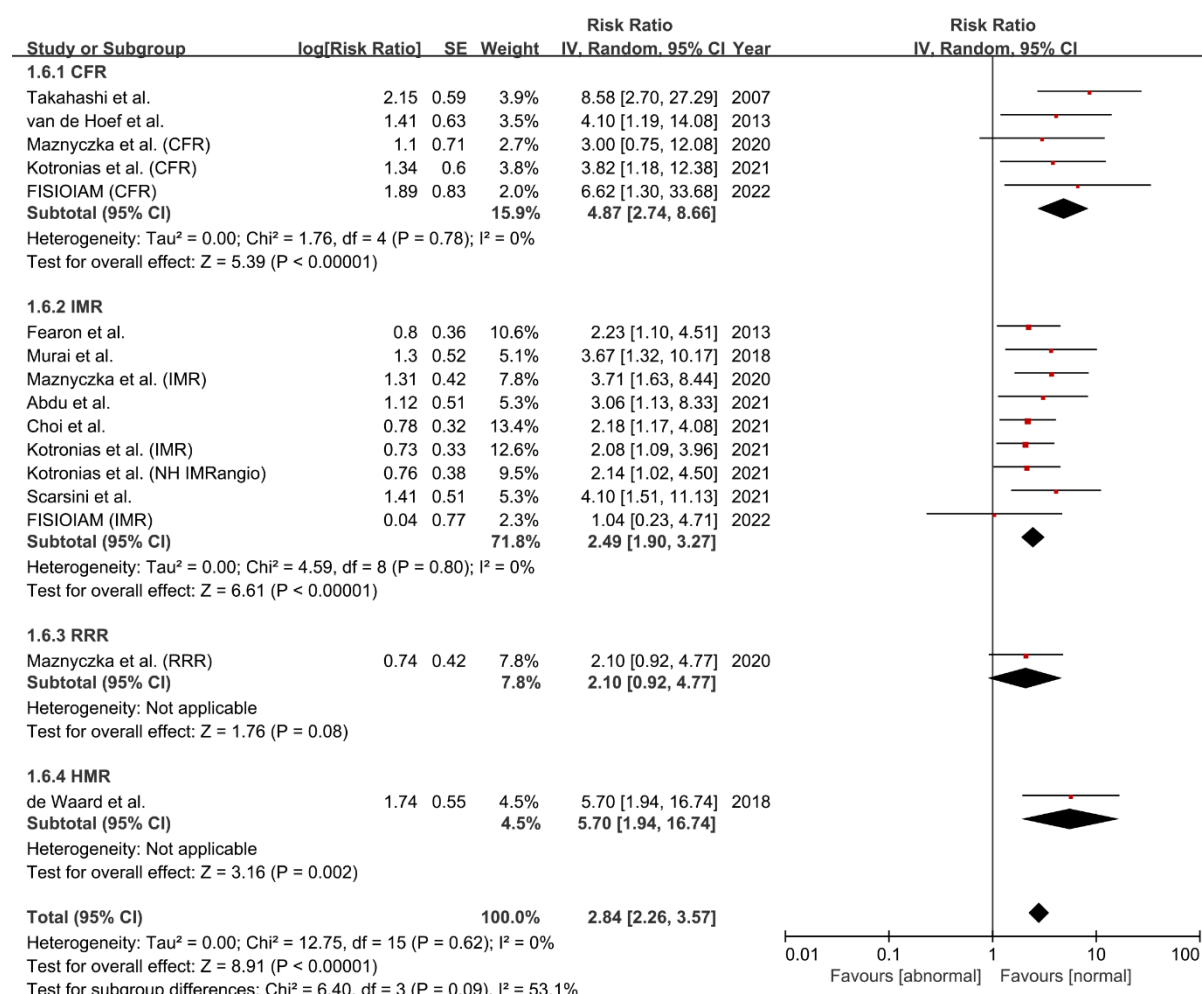

Risk ratios for individual studies are indicated by squares, and 95% CIs are indicated by horizontal lines.

Pooled estimates and their 95% CIs are represented by diamonds. The sizes of the squares and the diamonds are proportional to the weight assigned to the relative effect sizes.

ACS, acute coronary syndrome; CFR, coronary flow reserve; 95%CI, 95% confidence intervals; HMR, hyperemic microvascular resistance; IMR, index of microvascular resistance; IV, inverse-variance; MACE, major adverse cardiovascular event; NH IMRangio, nonhyperemic angiography-derived index of microcirculatory resistance; RRR, resistive reserve ratio; SE, standard error.

Xu Y et al. *Invasive assessment of coronary microvascular dysfunction and cardiovascular outcomes across the full spectrum of CAD: a meta-analysis.* Rev Esp Cardiol. 2024.

---

References: Takahashi et al.<sup>1</sup> van de Hoef et al.<sup>4</sup> Maznyczka et al.<sup>14</sup> Kotronias et al.<sup>18</sup> FISIOIAM.<sup>24</sup> Fearon et al.<sup>3</sup> Murai et al.<sup>8</sup> Abdu et al.<sup>15</sup> Choi et al.<sup>16</sup> Scarsini et al.<sup>19</sup> de Waard et al.<sup>6</sup>

Figure 6 of the supplementary data. Subgroup analysis for MACE stratified by measurement modalities in CCS population

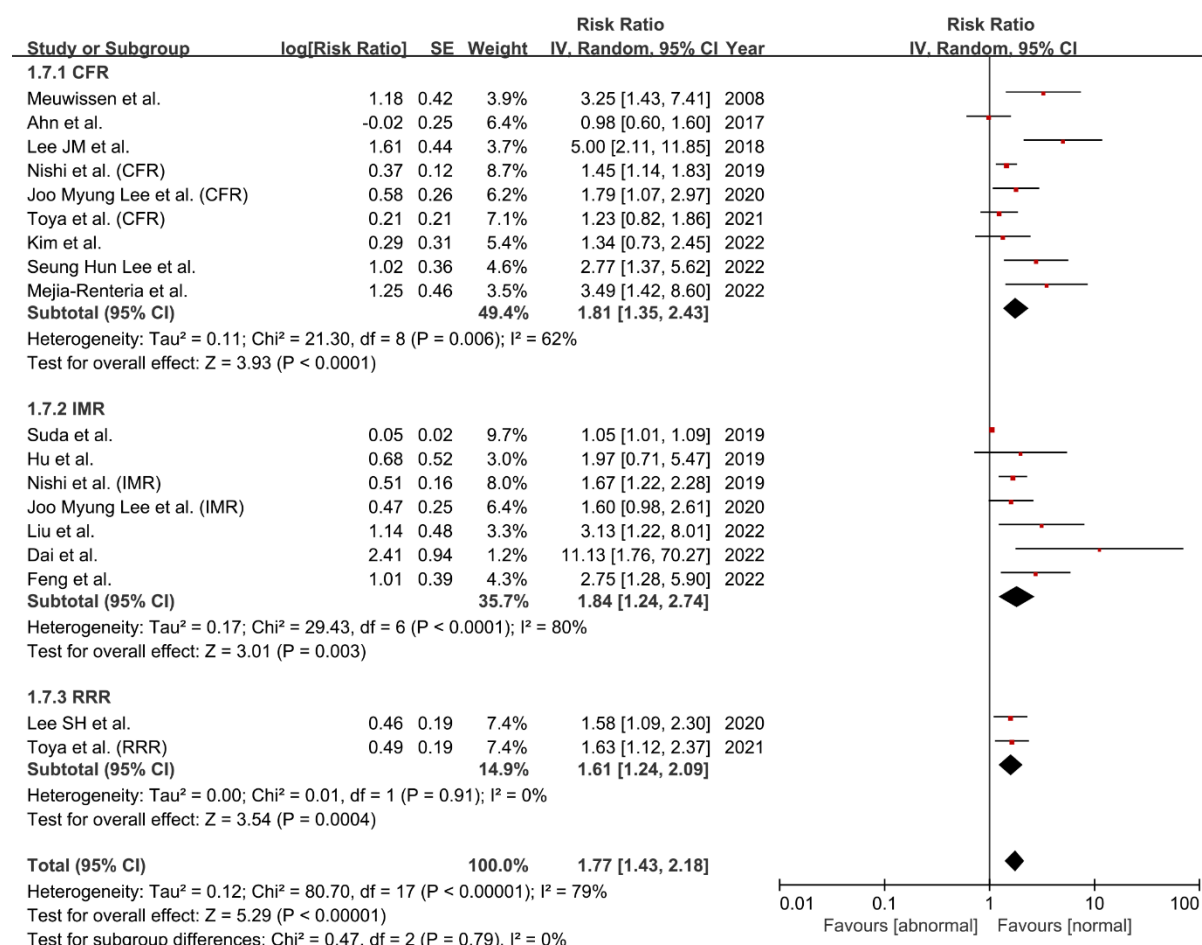

Risk ratios for individual studies are indicated by squares, and 95% CIs are indicated by horizontal lines. Pooled estimates and their 95% CIs are represented by diamonds. The sizes of the squares and the diamonds are proportional to the weight assigned to the relative effect sizes.

CCS, chronic coronary syndrome; CFR, coronary flow reserve; 95%CI, 95% confidence intervals; IMR, index of microvascular resistance; IV, inverse-variance; MACE, major adverse cardiovascular event; RRR, resistive reserve ratio; SE, standard error.

Reference: Meuwissen et al.<sup>2</sup> Ahn et al.<sup>5</sup> Lee JM et al.<sup>7</sup> Nishi et al.<sup>10</sup> Joo Myung Lee et al.<sup>12</sup> Toya et al.<sup>20</sup> Kim et al.<sup>25</sup> Seung Hun Lee et al.<sup>26</sup> Mejia-Renteria et al.<sup>27</sup> Suda et al.<sup>11</sup> Hu et al.<sup>9</sup> Liu et al.<sup>23</sup> Dai et al.<sup>21</sup> Feng et al.<sup>22</sup> Lee SH et al.<sup>13</sup> Toya et al.<sup>20</sup>

**Figure 7 of the supplementary data.** Subgroup analysis for all-cause death stratified by measurement modalities in ACS population

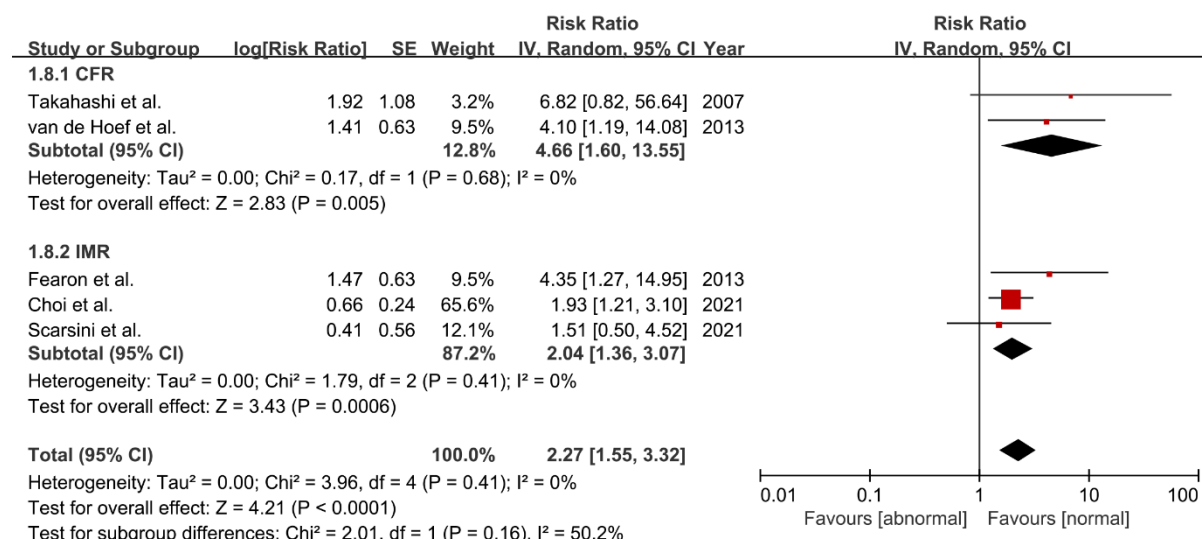

Risk ratios for individual studies are indicated by squares, and 95% CIs are indicated by horizontal lines.

Pooled estimates and their 95% CIs are represented by diamonds. The sizes of the squares and the diamonds are proportional to the weight assigned to the relative effect sizes.

ACS, acute coronary syndrome; CFR, coronary flow reserve; 95%CI, 95% confidence intervals; IMR, index of microvascular resistance; IV, inverse-variance; SE, standard error.

References: Takahashi et al.<sup>1</sup> van de Hoef et al.<sup>4</sup> Fearon et al.<sup>3</sup> Choi et al.<sup>16</sup> Scarsini et al.<sup>19</sup>

**Figure 8 of the supplementary data.** Subgroup analysis for all-cause death stratified by measurement modalities in CCS population

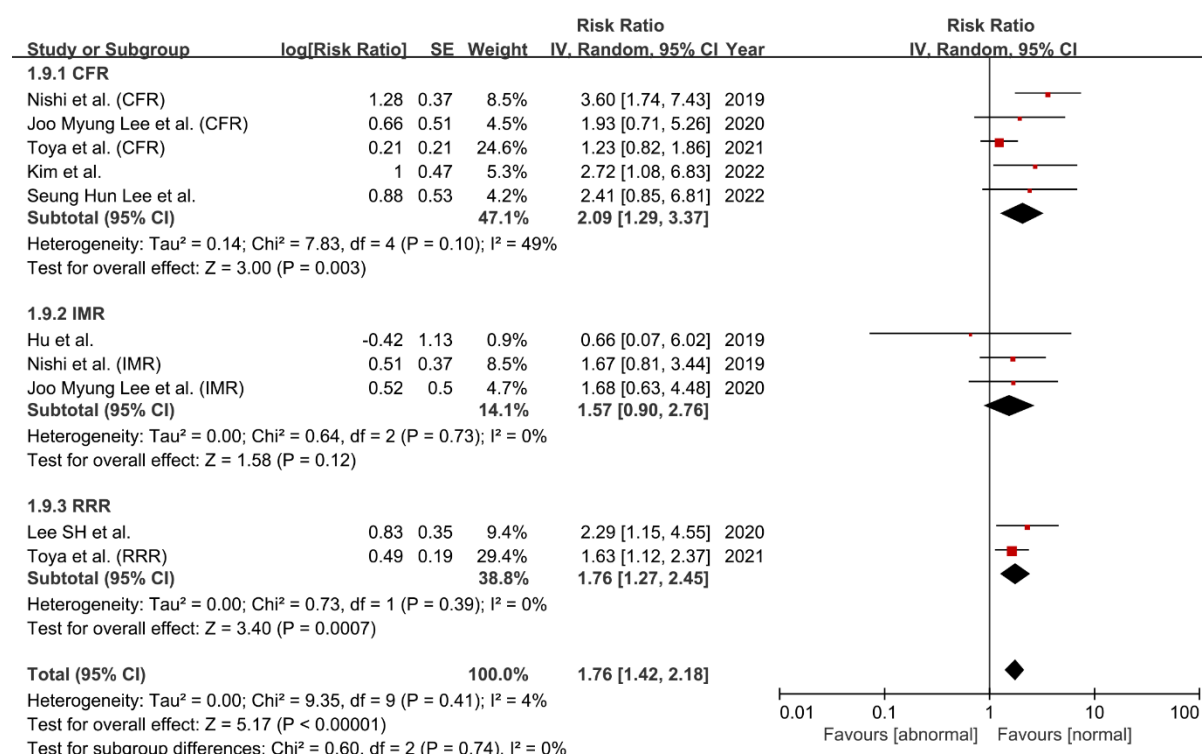

Risk ratios for individual studies are indicated by squares, and 95% CIs are indicated by horizontal lines.

Pooled estimates and their 95% CIs are represented by diamonds. The sizes of the squares and the diamonds are proportional to the weight assigned to the relative effect sizes.

CCS, chronic coronary syndrome; CFR, coronary flow reserve; 95%CI, 95% confidence interval; IMR, index of microvascular resistance; IV, inverse-variance; RRR, resistive reserve ratio; SE, standard error.

References: Nishi et al.<sup>10</sup> Joo Myung Lee et al.<sup>12</sup> Toya et al.<sup>20</sup> Kim et al.<sup>25</sup> Seung Hun Lee et al.<sup>26</sup> Hu et al.<sup>9</sup> Lee SH et al.<sup>13</sup>

Figure 9 of the supplementary data. Subgroup analysis for MACE stratified by study design

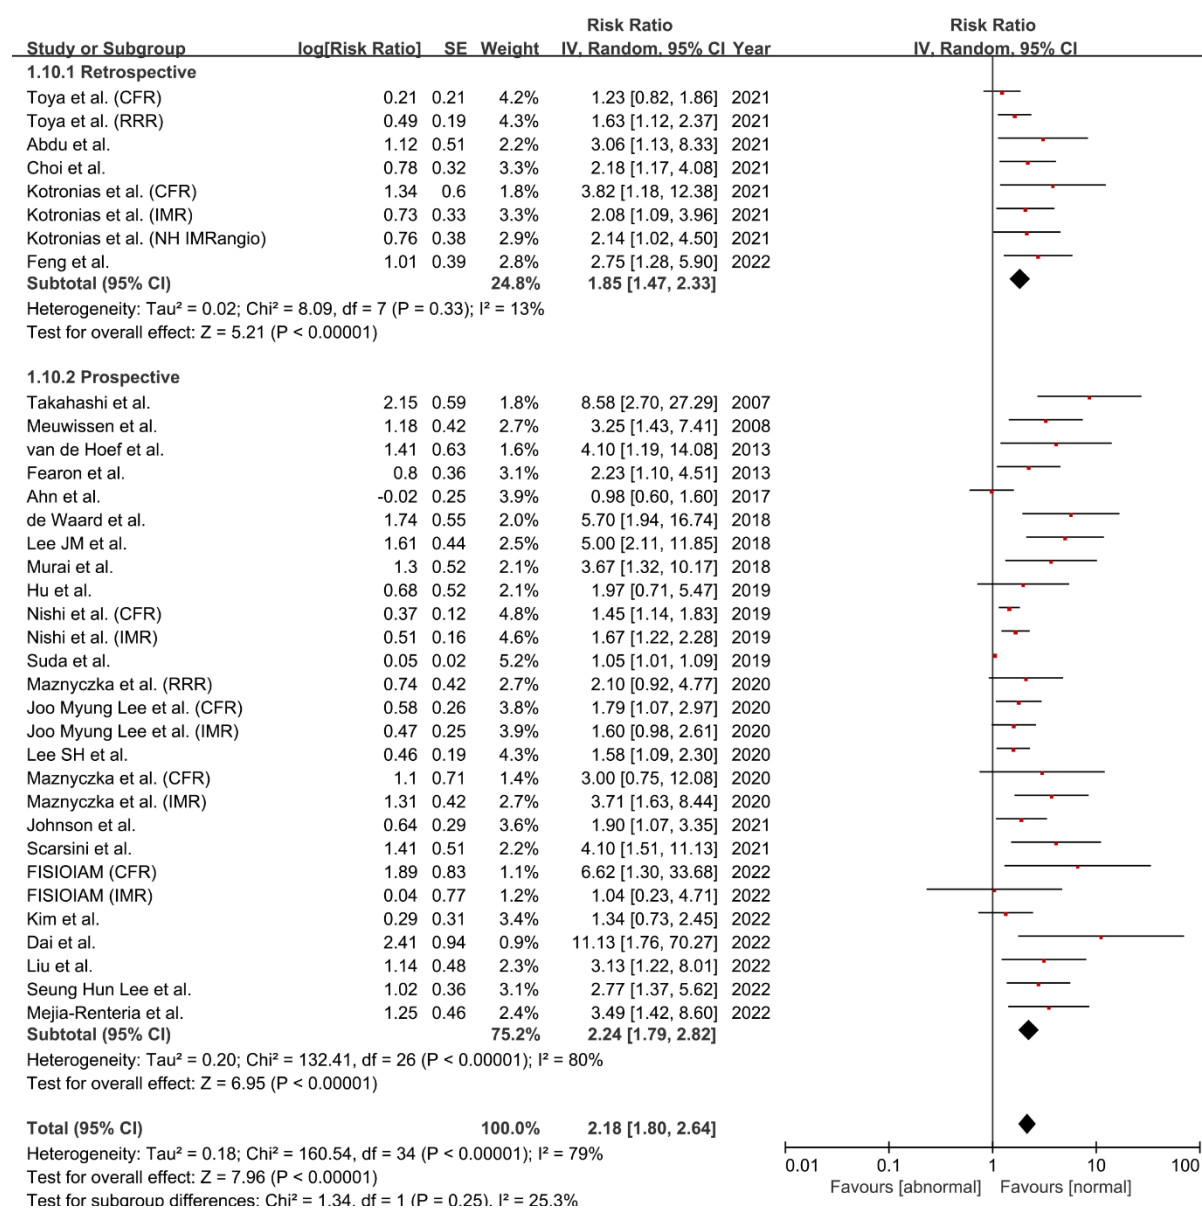

Risk ratios for individual studies are indicated by squares, and 95% CIs are indicated by horizontal lines. Pooled estimates and their 95% CIs are represented by diamonds. The sizes of the squares and the diamonds are proportional to the weight assigned to the relative effect sizes.

CFR, coronary flow reserve; 95%CI, 95% confidence interval; IMR, index of microvascular resistance; IV, inverse-variance; MACE, major adverse cardiovascular event; NH IMRangio, nonhyperemic angiography-derived index of microcirculatory resistance; RRR, resistive reserve ratio; SE, standard error.



References: Takahashi et al.<sup>1</sup> Meuwissen et al.<sup>2</sup> Fearon et al.<sup>3</sup> van de Hoef et al.<sup>4</sup> Ahn et al.<sup>5</sup> Murai et al.<sup>8</sup> de Waard et al.<sup>6</sup> Lee JM et al.<sup>7</sup> Nishi et al.<sup>10</sup> Suda et al.<sup>11</sup> Hu et al.<sup>9</sup> Joo Myung Lee et al.<sup>12</sup> Lee SH et al.<sup>13</sup> Maznyczka et al.<sup>14</sup> Abdu et al.<sup>15</sup> Choi et al.<sup>16</sup> Johnson et al.<sup>17</sup> Kotronias et al.<sup>18</sup> Scarsini et al.<sup>19</sup> Toya et al.<sup>20</sup> FISIOIAM.<sup>24</sup> Kim et al.<sup>25</sup> Seung Hun Lee et al.<sup>26</sup> Dai et al.<sup>21</sup> Feng et al.<sup>22</sup> Liu et al.<sup>23</sup> Mejia-Renteria et al.<sup>27</sup>

Figure 10 of the supplementary data. Subgroup analysis for MACE stratified by follow-up duration

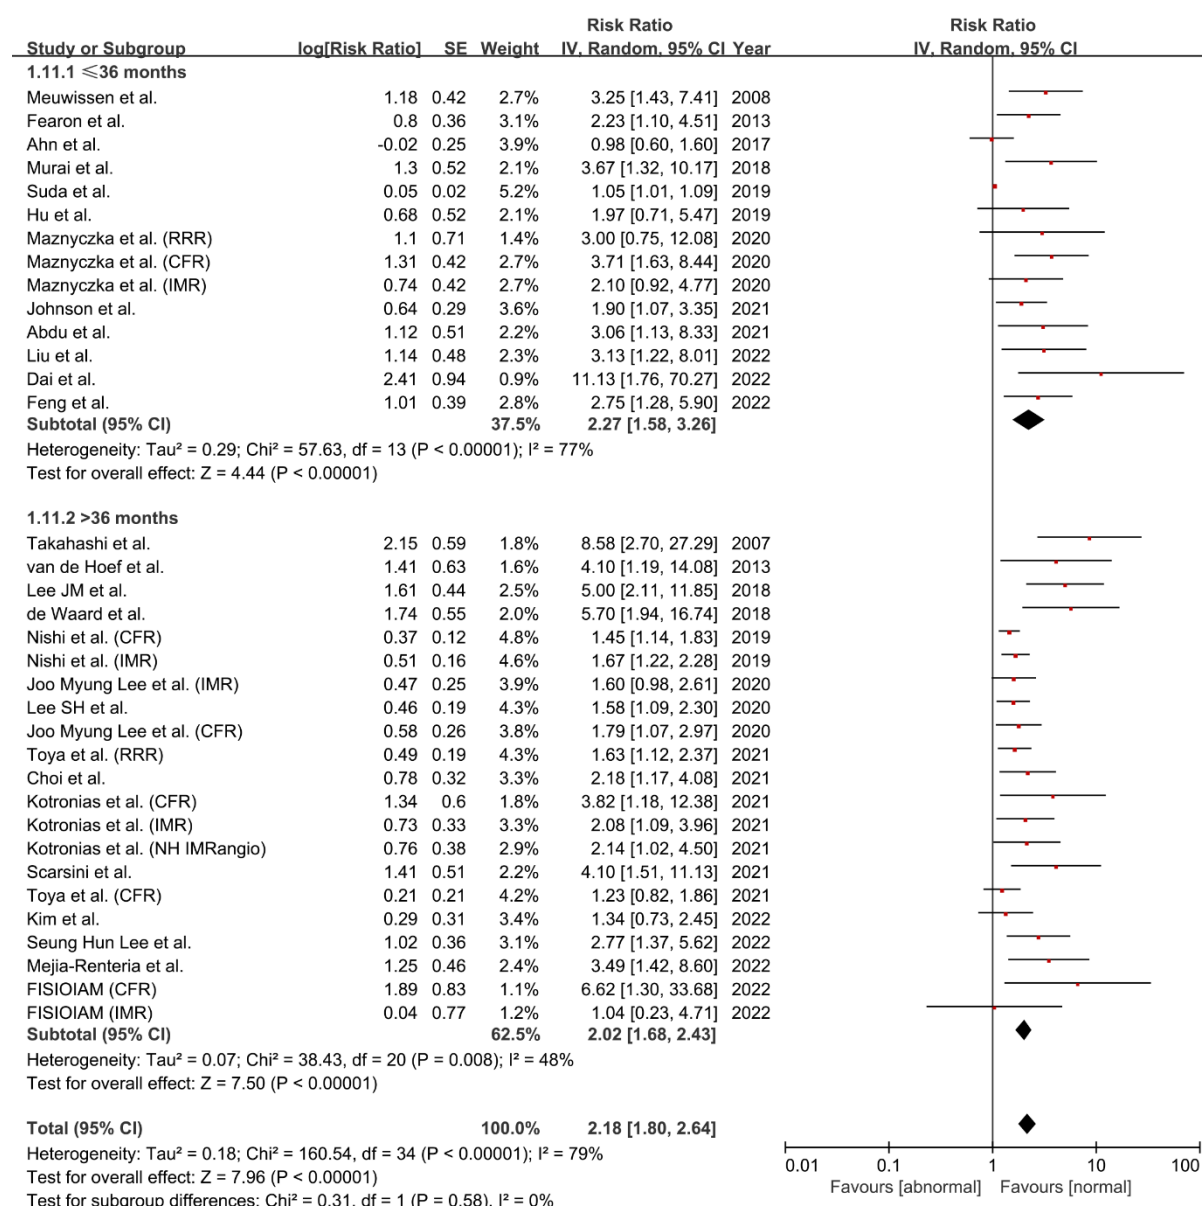

Risk ratios for individual studies are indicated by squares, and 95% CIs are indicated by horizontal lines.

Pooled estimates and their 95% CIs are represented by diamonds. The sizes of the squares and the diamonds are proportional to the weight assigned to the relative effect sizes.

95%CI, 95% confidence interval; CCS, chronic coronary syndrome; CFR, coronary flow reserve; IMR, index of microvascular resistance; IV, inverse-variance; RRR, resistive reserve ratio; SE, standard error.

References: Takahashi et al.<sup>1</sup> Meuwissen et al.<sup>2</sup> Fearon et al.<sup>3</sup> van de Hoef et al.<sup>4</sup> Ahn et al.<sup>5</sup> Murai et al.<sup>8</sup> de Waard et al.<sup>6</sup> Lee JM et al.<sup>7</sup> Nishi et al.<sup>10</sup> Suda et al.<sup>11</sup> Hu et al.<sup>9</sup> Joo Myung Lee et al.<sup>12</sup> Lee SH et al.<sup>13</sup> Maznyczka et al.<sup>14</sup> Abdu et al.<sup>15</sup> Choi et al.<sup>16</sup> Johnson et al.<sup>17</sup> Kotronias et al.<sup>18</sup> Scarsini et al.<sup>19</sup> Toya et al.<sup>20</sup> FISIOIAM.<sup>24</sup> Kim et al.<sup>25</sup> Seung Hun Lee et al.<sup>26</sup> Dai et al.<sup>21</sup> Feng et al.<sup>22</sup> Liu et al.<sup>23</sup> Mejia-Renteria et al.<sup>27</sup>

Figure 11 of the supplementary data. Subgroup analysis for all-cause death stratified by study design

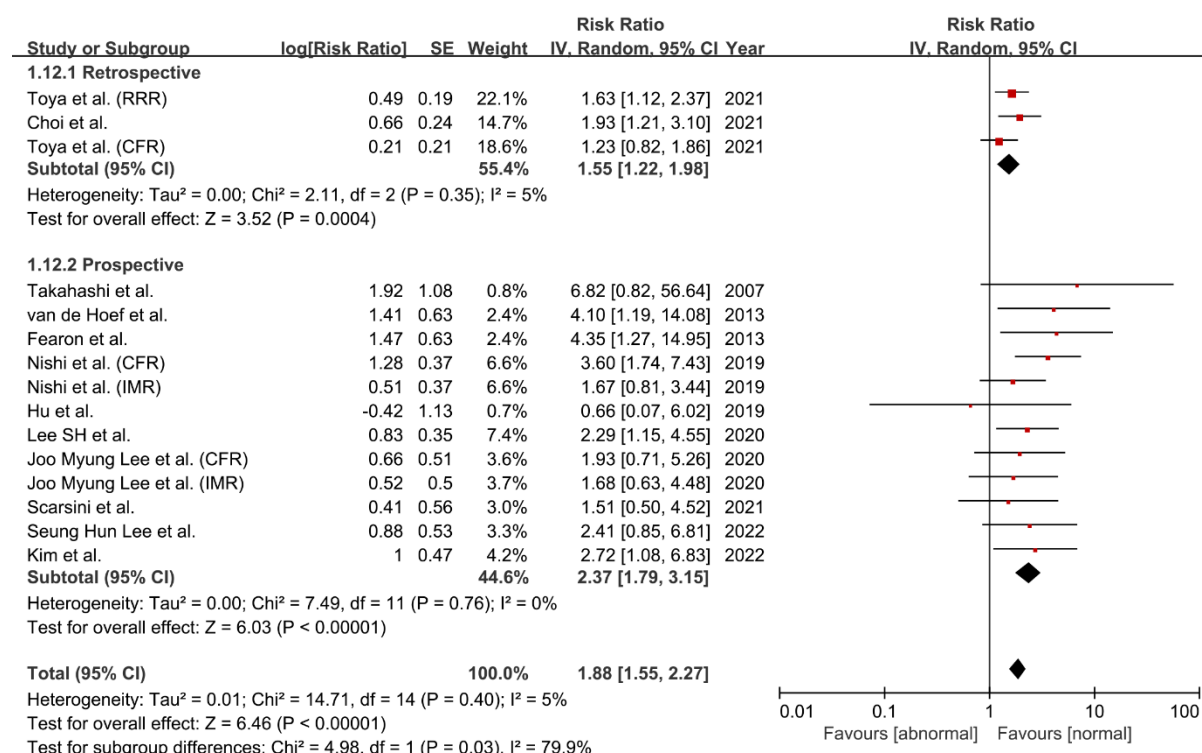

Risk ratios for individual studies are indicated by squares, and 95% CIs are indicated by horizontal lines.

Pooled estimates and their 95% CIs are represented by diamonds. The sizes of the squares and the diamonds are proportional to the weight assigned to the relative effect sizes.

CFR, coronary flow reserve; 95%CI, 95% confidence interval; IMR, index of microvascular resistance; IV, inverse-variance; RRR, resistive reserve ratio; SE, standard error.

References: Takahashi et al.<sup>1</sup> van de Hoef et al.<sup>4</sup> Fearon et al.<sup>3</sup> Nishi et al.<sup>10</sup> Hu et al.<sup>9</sup> Joo Myung Lee et al.<sup>12</sup> Lee SH et al.<sup>13</sup> Scarsini et al.<sup>19</sup> Toya et al.<sup>20</sup> Choi et al.<sup>16</sup> Kim et al.<sup>25</sup> Seung Hun Lee et al.<sup>26</sup>

Figure 12 of the supplementary data. Subgroup analysis for all-cause death stratified by follow-up duration

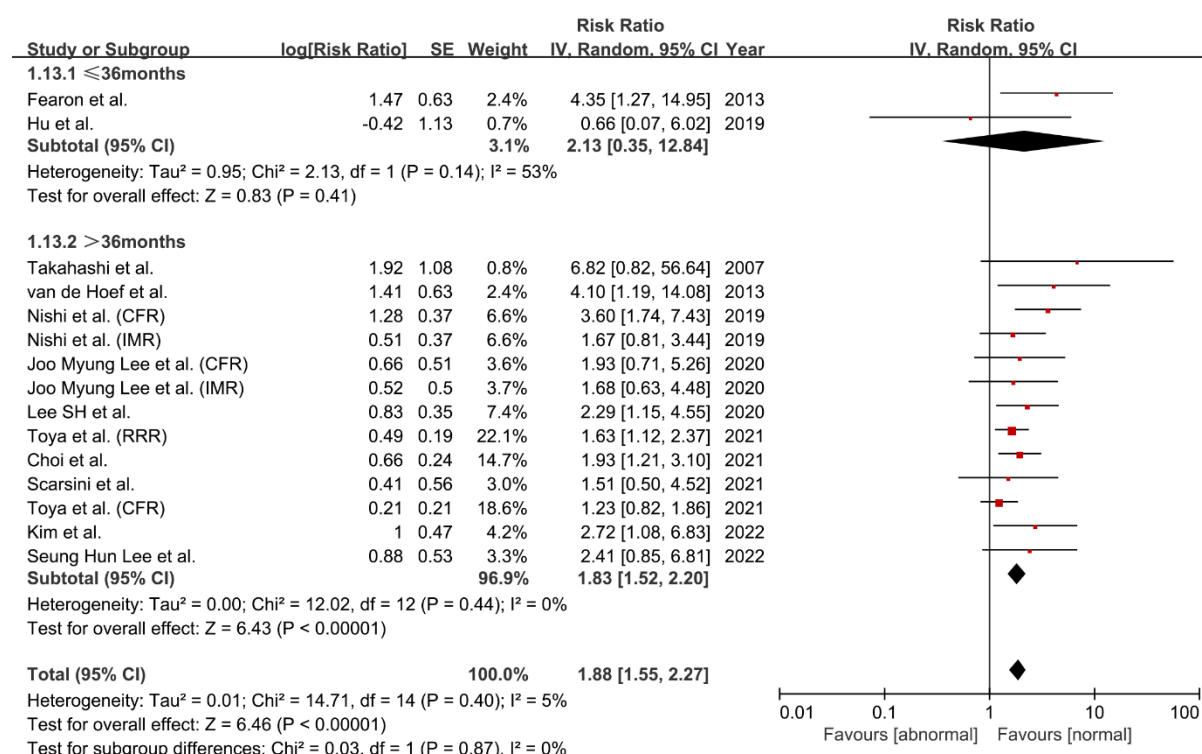

Risk ratios for individual studies are indicated by squares, and 95% CIs are indicated by horizontal lines.

Pooled estimates and their 95% CIs are represented by diamonds. The sizes of the squares and the diamonds are proportional to the weight assigned to the relative effect sizes.

CCS, chronic coronary syndrome; CFR, coronary flow reserve; 95%CI, 95% confidence interval; IMR, index of microvascular resistance; IV, inverse-variance; RRR, resistive reserve ratio; SE, standard error.

References: Takahashi et al.<sup>1</sup> van de Hoef et al.<sup>4</sup> Fearon et al.<sup>3</sup> Nishi et al.<sup>10</sup> Hu et al.<sup>9</sup> Joo Myung Lee et al.<sup>12</sup> Lee SH et al.<sup>13</sup> Scarsini et al.<sup>19</sup> Toya et al.<sup>20</sup> Choi et al.<sup>16</sup> Kim et al.<sup>25</sup> Seung Hun Lee et al.<sup>26</sup>

Figure 13 of the supplementary data. Subgroup analysis for MACE stratified by the definition of outcomes

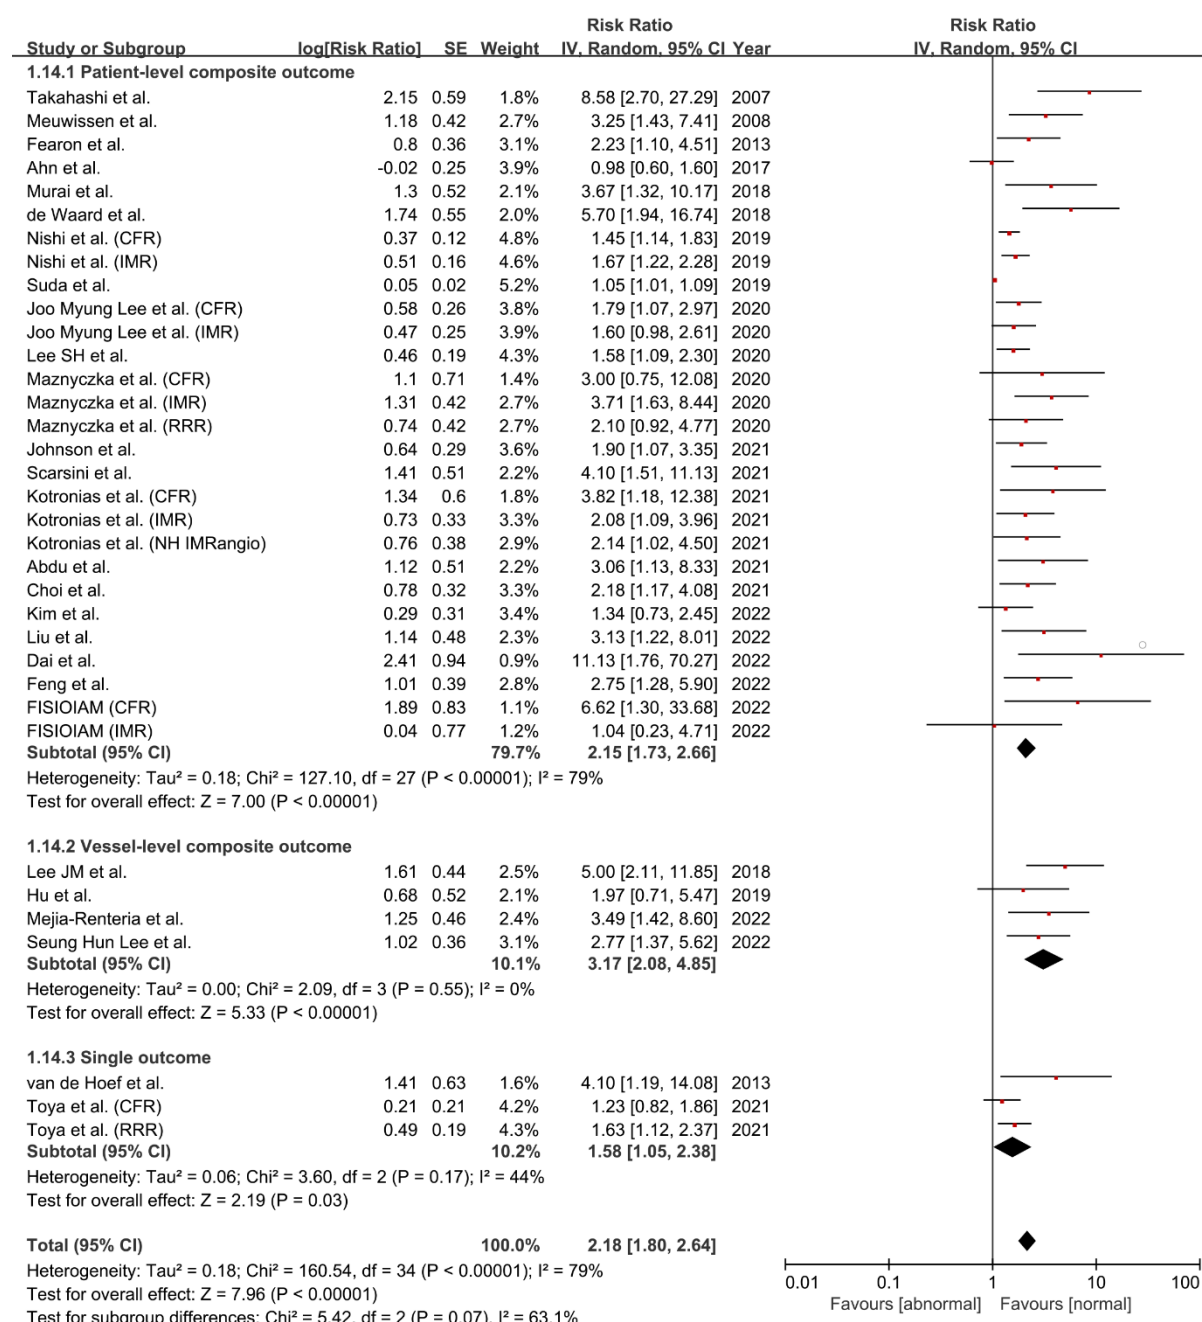

Risk ratios for individual studies are indicated by squares, and 95% CIs are indicated by horizontal lines. Pooled estimates and their 95% CIs are represented by diamonds. The sizes of the squares and the diamonds are proportional to the weight assigned to the relative effect sizes.

CCS, chronic coronary syndrome; CFR, coronary flow reserve; 95%CI, 95% confidence intervals; IMR, index of microvascular resistance; IV, inverse-variance; RRR, resistive reserve ratio; SE, standard error.

References: Takahashi et al.<sup>1</sup> Meuwissen et al.<sup>2</sup> Fearon et al.<sup>3</sup> van de Hoef et al.<sup>4</sup> Ahn et al.<sup>5</sup> Murai et al.<sup>8</sup> de Waard et al.<sup>6</sup> Lee JM et al.<sup>7</sup> Nishi et al.<sup>10</sup> Suda et al.<sup>11</sup> Hu et al.<sup>9</sup> Joo Myung Lee et al.<sup>12</sup> Lee SH et al.<sup>13</sup> Maznyczka et al.<sup>14</sup> Abdu et al.<sup>15</sup> Choi et al.<sup>16</sup> Johnson et al.<sup>17</sup> Kotronias et al.<sup>18</sup> Scarsini et al.<sup>19</sup> Toya et al.<sup>20</sup> FISIOIAM.<sup>24</sup> Kim et al.<sup>25</sup> Seung Hun Lee et al.<sup>26</sup> Dai et al.<sup>21</sup> Feng et al.<sup>22</sup> Liu et al.<sup>23</sup> Mejia-Renteria et al.<sup>27</sup>

Figure 14 of the supplementary data. Subgroup analysis for MACE stratified by the data type

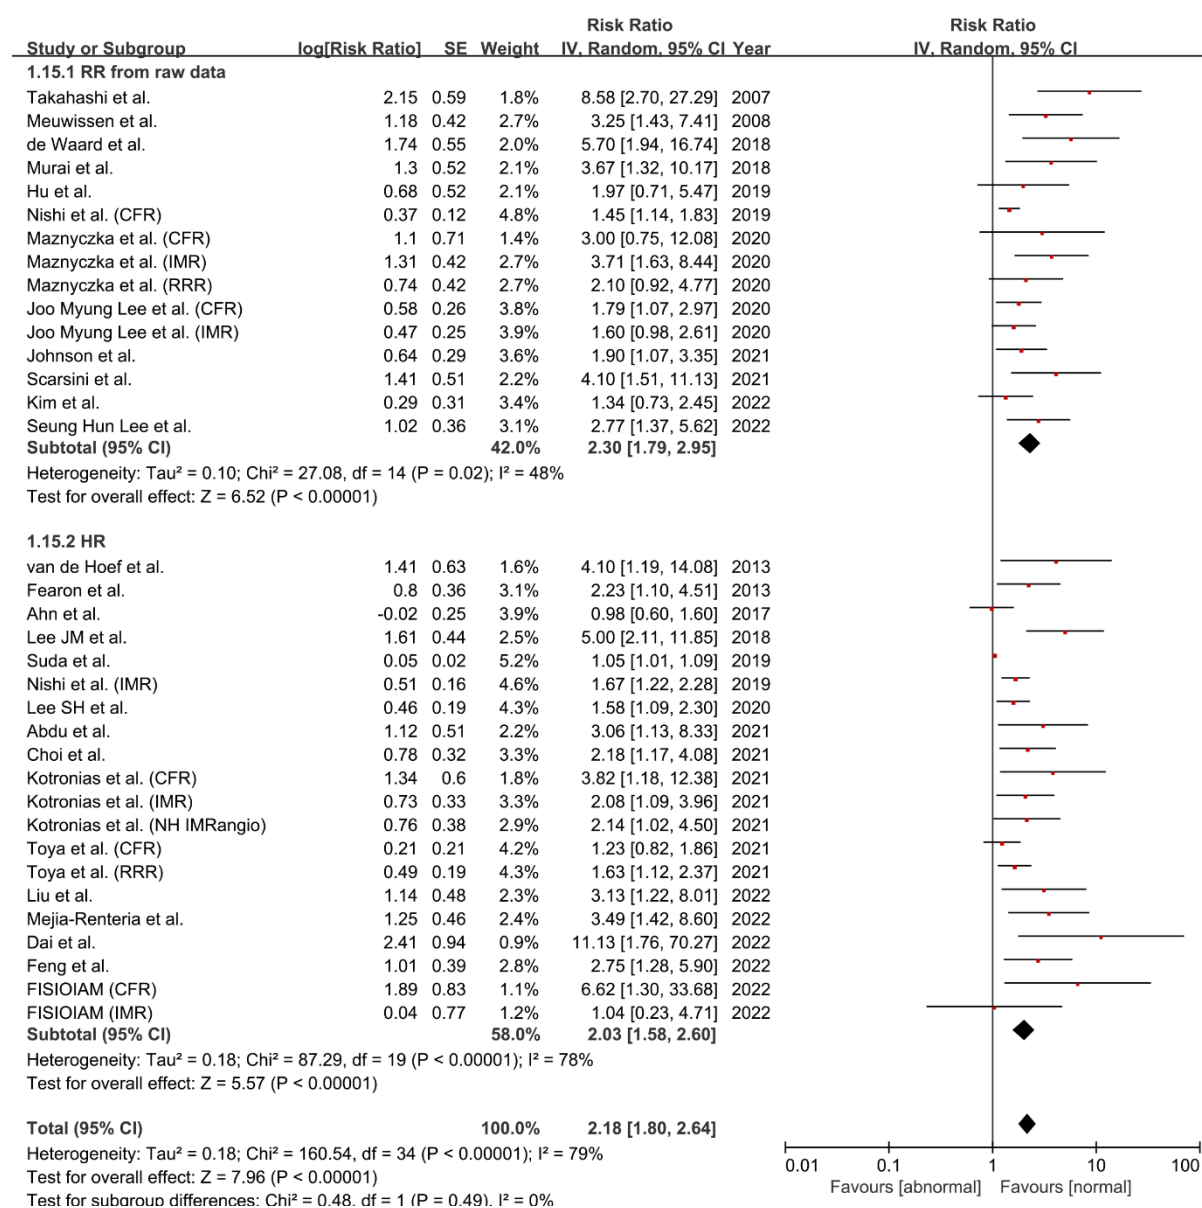

Risk ratios for individual studies are indicated by squares, and 95% CIs are indicated by horizontal lines.

Pooled estimates and their 95% CIs are represented by diamonds. The sizes of the squares and the diamonds are proportional to the weight assigned to the relative effect sizes.

CCS, chronic coronary syndrome; CFR, coronary flow reserve; 95%CI, 95% confidence interval; IMR, index of microvascular resistance; IV, inverse-variance; RRR, resistive reserve ratio; SE, standard error.



References: Takahashi et al.<sup>1</sup> Meuwissen et al.<sup>2</sup> Fearon et al.<sup>3</sup> van de Hoef et al.<sup>4</sup> Ahn et al.<sup>5</sup> Murai et al.<sup>8</sup>  
de Waard et al.<sup>6</sup> Lee JM et al.<sup>7</sup> Nishi et al.<sup>10</sup> Suda et al.<sup>11</sup> Hu et al.<sup>9</sup> Joo Myung Lee et al.<sup>12</sup> Lee SH et al.<sup>13</sup>  
Maznyczka et al.<sup>14</sup> Abdu et al.<sup>15</sup> Choi et al.<sup>16</sup> Johnson et al.<sup>17</sup> Kotronias et al.<sup>18</sup> Scarsini et al.<sup>19</sup> Toya et  
al.<sup>20</sup> FISIOIAM.<sup>24</sup> Kim et al.<sup>25</sup> Seung Hun Lee et al.<sup>26</sup> Dai et al.<sup>21</sup> Feng et al.<sup>22</sup> Liu et al.<sup>23</sup> Mejia-Renteria et  
al.<sup>27</sup>

Figure 15 of the supplementary data. Publication bias for MACE and all-cause death

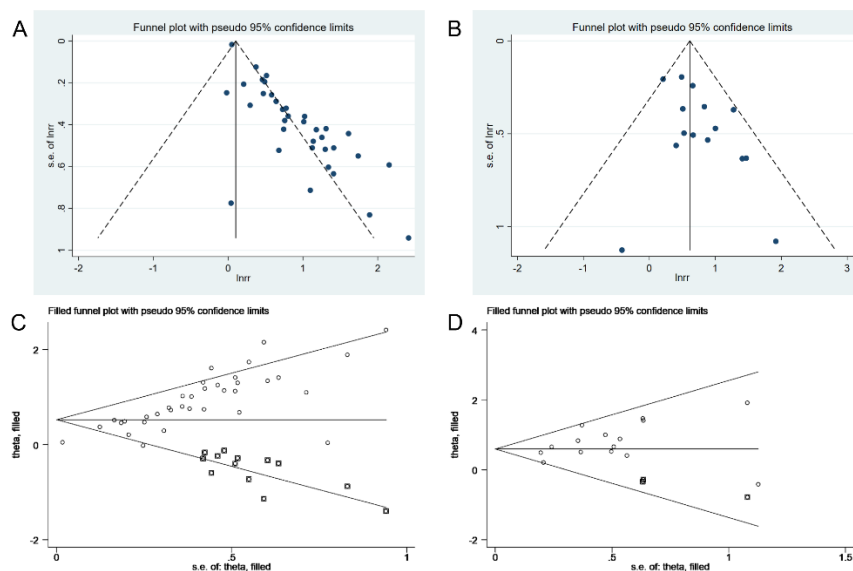

A: funnel plot assesses publication bias for MACE. The asymmetry on both sides of the funnel plot suggested the existence of publication bias. Egger’s test demonstrated the possibility of publication bias ( $P < .05$ ). B: funnel plot assesses publication bias for all-cause death. The asymmetry on both sides of the funnel plot suggested the existence of publication bias. Egger’s test demonstrated the possibility of publication bias ( $P = .05$ ). C: publication bias for MACE was corrected by the trim-and-fill method. The square below represents supplementary studies by trim-and-fill method. Thirteen additional studies were added to control for publication bias, and the result showed that patients with CMD had a higher risk of MACE (RR, 1.69; 95%CI, 1.43-1.99;  $P < .01$ ). D: publication bias for all-cause death was corrected by the trim-and-fill method. The square below represents supplementary studies by the trim-and-fill method. Three additional studies were added to control for publication bias, and the result showed that patients with CMD had a higher risk of all-cause death (RR, 1.81; 95%CI, 1.46-2.23;  $P < .01$ ).

CMD, coronary microvascular dysfunction; lnrr, natural logarithm of the risk ratio MACE, major adverse cardiovascular event; RR, risk ratio; SE, standard error.

Figure 16 of the supplementary data. Sensitivity analysis for MACE

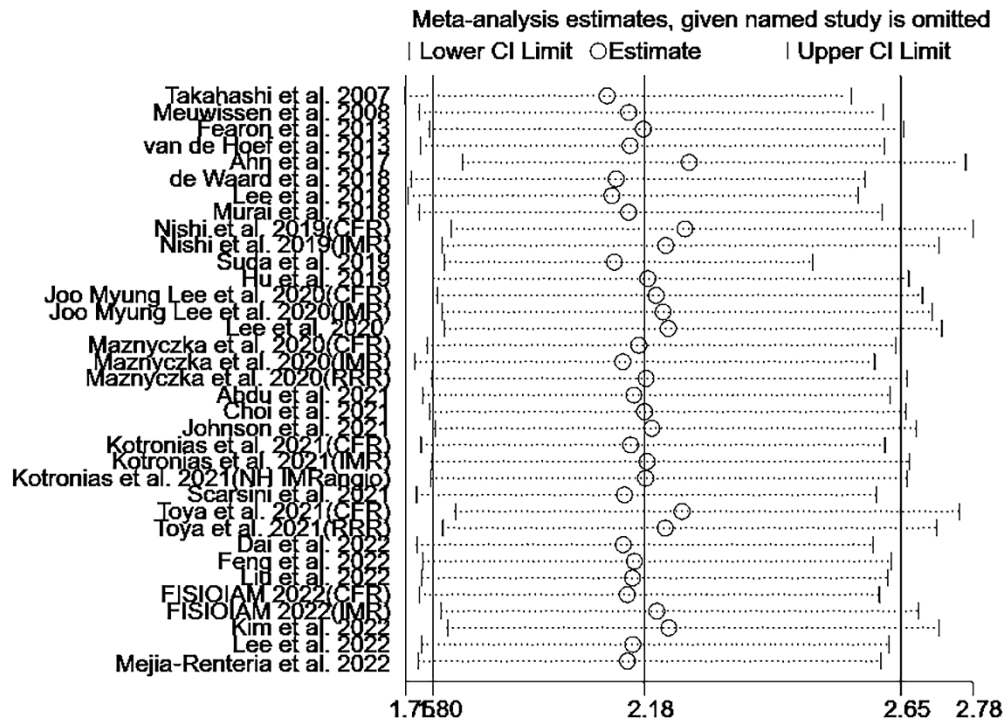

CFR, coronary flow reserve; CI, confidence intervals; IMR, index of microvascular resistance; MACE, major adverse cardiovascular event; NH IMRangio, nonhyperemic angiography-derived index of microcirculatory resistance; RRR, resistive reserve ratio.

References: Takahashi et al.<sup>1</sup>Meuwissen et al.<sup>2</sup> Fearon et al.<sup>3</sup> van de Hoef et al.<sup>4</sup> Ahn et al.<sup>5</sup> Murai et al.<sup>8</sup> de Waard et al.<sup>6</sup> Lee et al. 2018<sup>7</sup> Nishi et al.<sup>10</sup> Suda et al.<sup>11</sup> Hu et al.<sup>9</sup> Joo Myung Lee et al.<sup>12</sup> Lee et al. 2020<sup>13</sup> Maznyczka et al.<sup>14</sup> Abdu et al.<sup>15</sup> Choi et al.<sup>16</sup> Johnson et al.<sup>17</sup> Kotronias et al.<sup>18</sup> Scarsini et al.<sup>19</sup> Toya et al.<sup>20</sup> FISIOIAM.<sup>24</sup> Kim et al.<sup>25</sup> Lee et al. 2022<sup>26</sup> Dai et al.<sup>21</sup> Feng et al.<sup>22</sup> Liu et al.<sup>23</sup> Mejia-Renteria et al.<sup>27</sup>

Figure 17 of the supplementary data. Sensitivity analysis for all-cause death

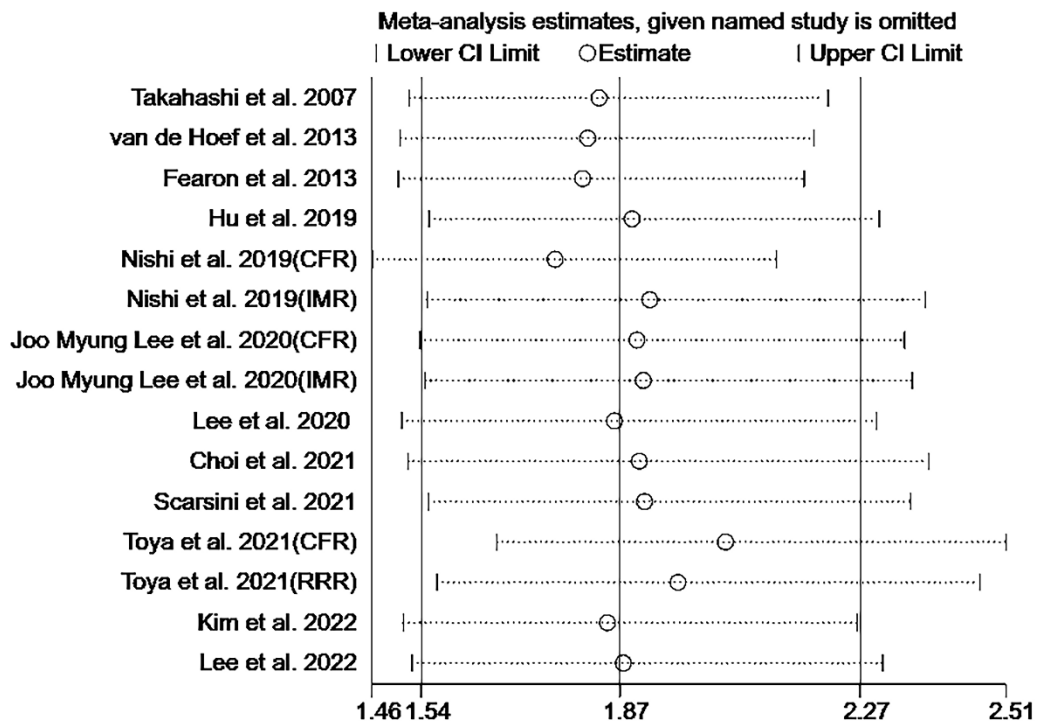

CFR, coronary flow reserve; CI, confidence intervals; IMR, index of microvascular resistance; RRR, resistive reserve ratio.

References: Takahashi et al.<sup>1</sup> van de Hoef et al.<sup>4</sup> Fearon et al.<sup>3</sup> Nishi et al.<sup>10</sup> Hu et al.<sup>9</sup> Joo Myung Lee et al.<sup>12</sup> Lee et al. 2020<sup>13</sup> Scarsini et al.<sup>19</sup> Toya et al.<sup>20</sup> Choi et al.<sup>16</sup> Kim et al.<sup>25</sup> Lee et al. 2022<sup>26</sup>

## REFERENCES

1. Takahashi T, Hiasa Y, Ohara Y, et al. Usefulness of coronary flow reserve immediately after primary coronary angioplasty for acute myocardial infarction in predicting long-term adverse cardiac events. *Am J Cardiol.* 2007;100:806-811.
2. Meuwissen M, Chamuleau SA, Siebes M, et al. The prognostic value of combined intracoronary pressure and blood flow velocity measurements after deferral of percutaneous coronary intervention. *Catheter Cardiovasc Interv.* 2008;71:291-297.
3. Fearon WF, Low AF, Yong AS, et al. Prognostic value of the Index of Microcirculatory Resistance measured after primary percutaneous coronary intervention. *Circulation.* 2013;127:2436-2441.
4. van de Hoef TP, Bax M, Meuwissen M, et al. Impact of coronary microvascular function on long-term cardiac mortality in patients with acute ST-segment-elevation myocardial infarction. *Circ Cardiovasc Interv.* 2013;6:207-215.
5. Ahn JM, Zimmermann FM, Johnson NP, et al. Fractional flow reserve and pressure-bounded coronary flow reserve to predict outcomes in coronary artery disease. *Eur Heart J.* 2017;38:1980-1989.
6. de Waard GA, Fahrni G, de Wit D, et al. Hyperaemic microvascular resistance predicts clinical outcome and microvascular injury after myocardial infarction. *Heart.* 2018;104:127-134.
7. Lee JM, Choi KH, Hwang D, et al. Prognostic Implication of Thermodilution Coronary Flow Reserve in Patients Undergoing Fractional Flow Reserve Measurement. *JACC Cardiovasc Interv.* 2018;11:1423-1433.

8. Murai T, Yonetsu T, Kanaji Y, et al. Prognostic value of the index of microcirculatory resistance after percutaneous coronary intervention in patients with non-ST-segment elevation acute coronary syndrome. *Catheter Cardiovasc Interv.* 2018;92:1063-1074.
9. Hu X, Zhang J, Lee JM, et al. Prognostic impact of diabetes mellitus and index of microcirculatory resistance in patients undergoing fractional flow reserve-guided revascularization. *Int J Cardiol.* 2020;307:171-175.
10. Nishi T, Murai T, Ciccarelli G, et al. Prognostic Value of Coronary Microvascular Function Measured Immediately After Percutaneous Coronary Intervention in Stable Coronary Artery Disease: An International Multicenter Study. *Circ Cardiovasc Interv.* 2019;12:e007889.
11. Suda A, Takahashi J, Hao K, et al. Coronary Functional Abnormalities in Patients With Angina and Nonobstructive Coronary Artery Disease. *J Am Coll Cardiol.* 2019;74:2350-2360.
12. Lee JM, Choi KH, Doh JH, et al. Long-term Patient Prognostication by Coronary Flow Reserve and Index of Microcirculatory Resistance: International Registry of Comprehensive Physiologic Assessment. *Korean Circ J.* 2020;50:890-903.
13. Lee SH, Lee JM, Park J, et al. Prognostic Implications of Resistive Reserve Ratio in Patients With Coronary Artery Disease. *J Am Heart Assoc.* 2020;9:e015846.
14. Maznyczka AM, Oldroyd KG, Greenwood JP, et al. Comparative Significance of Invasive Measures of Microvascular Injury in Acute Myocardial Infarction. *Circ Cardiovasc Interv.* 2020;13:e008505.

15. Abdu FA, Liu L, Mohammed AQ, et al. Prognostic impact of coronary microvascular dysfunction in patients with myocardial infarction with non-obstructive coronary arteries. *Eur J Intern Med.* 2021;92:79-85.
16. Choi KH, Dai N, Li Y, et al. Functional Coronary Angiography-Derived Index of Microcirculatory Resistance in Patients With ST-Segment Elevation Myocardial Infarction. *JACC Cardiovasc Interv.* 2021;14:1670-1684.
17. Johnson NP, Matsuo H, Nakayama M, et al. Combined Pressure and Flow Measurements to Guide Treatment of Coronary Stenoses. *JACC Cardiovasc Interv.* 2021;14:1904-1913.
18. Kotronias RA, Terentes-Printzios D, Shanmuganathan M, et al. Long-Term Clinical Outcomes in Patients With an Acute ST-Segment-Elevation Myocardial Infarction Stratified by Angiography-Derived Index of Microcirculatory Resistance. *Front Cardiovasc Med.* 2021;8:717114.
19. Scarsini R, Shanmuganathan M, De Maria GL, et al. Coronary Microvascular Dysfunction Assessed by Pressure Wire and CMR After STEMI Predicts Long-Term Outcomes. *JACC Cardiovasc Imaging.* 2021;14:1948-1959.
20. Toya T, Ahmad A, Corban MT, et al. Risk Stratification of Patients With NonObstructive Coronary Artery Disease Using Resistive Reserve Ratio. *J Am Heart Assoc.* 2021;10:e020464.
21. Dai N, Che W, Liu L, et al. Diagnostic Value of Angiography-Derived IMR for Coronary Microcirculation and Its Prognostic Implication After PCI. *Front Cardiovasc Med.* 2021;8:735743.

22. Feng C, Abdu FA, Mohammed AQ, et al. Prognostic impact of coronary microvascular dysfunction assessed by calMR in overweight with chronic coronary syndrome patients. *Front Endocrinol (Lausanne).* 2022;13:922264.
23. Liu L, Dai N, Yin G et al. Prognostic value of combined coronary angiography-derived IMR and myocardial perfusion imaging by CZT SPECT in INOCA. *J Nucl Cardiol.* 2023;30:684-701.
24. Flores CH, Diez-Delhoyo F, Sanz-Ruiz R, et al. Microvascular dysfunction of the non-culprit circulation predicts poor prognosis in patients with ST-segment elevation myocardial infarction. *Int J Cardiol Heart Vasc.* 2022;39:100997.
25. Kim J, Shin D, Lee JM, et al. Differential Prognostic Value of Revascularization for Coronary Stenosis With Intermediate FFR by Coronary Flow Reserve. *JACC Cardiovasc Interv.* 2022;15:1033-1043.
26. Lee SH, Shin D, Lee JM, et al. Clinical Relevance of Ischemia with Nonobstructive Coronary Arteries According to Coronary Microvascular Dysfunction. *J Am Heart Assoc.* 2022;11:e025171.
27. Mejia-Renteria H, Faria D, Lee JM, et al. Association between patient age, microcirculation, and coronary stenosis assessment with fractional flow reserve and instantaneous wave-free ratio. *Catheter Cardiovasc Interv.* 2022;99:1104-1114.
